# Supplementary material for: A Simulated Annealing Enhancement of the Best-Fit Heuristic for the Orthogonal Stock-Cutting Problem
Source: Atypon-hosted journal article supplement (doi:10.1287/ijoc.1080.0306), 2009-02-07
Supplement: ijoc.1080.0306-sm-burke_kendall_whitwell.pdf [file ijoc.1080.0306-sm-burke_kendall_whitwell.pdf]

# Online Supplement to “A Simulated Annealing Enhancement of the Best-Fit Heuristic for the Orthogonal Stock Cutting Problem”

Edmund K. Burke, Graham Kendall, Glenn Whitwell

School of Computer Science, University of Nottingham, Jubilee Campus, Nottingham, NG8 1BB, United Kingdom, {ekb@cs.nott.ac.uk, gxk@cs.nott.ac.uk, gxw@cs.nott.ac.uk}

## A. 1. Metaheuristic Parameters (see section 2.1 of the main article)

We hybridise the bottom-left-fill heuristic with metaheuristic search techniques by employing the metaheuristics to produce orderings and then these orderings are ‘decoded’ into a solution and evaluated through the use of the bottom-left-fill heuristic. In order to obtain input sequences we assign a numerical identification to each rectangle. Therefore a sequence such as: 4,2,5,1,3 describes the solution obtained by the bottom-left-fill heuristic packing the 4<sup>th</sup> rectangle first, 2<sup>nd</sup> rectangle second, and so forth. In the problem studied in this paper, we allow rotations of 90° and encode rectangle orientation by using a boolean flag for each rectangle within a solution sequence. We investigate and evaluate three metaheuristic enhancements: tabu search, simulated annealing and genetic algorithms. Due to the experiments of Hopper and Turton (2001) into different input orderings, we seed our metaheuristic approaches using the decreasing height sequence.

### Tabu Search

We implemented a tabu search algorithm that uses a neighbourhood size of 5 and a tabu list of 1,000 solutions. A suitable value for the neighbourhood size was found by preliminary experiments and the tabu list was set to a large size to discourage revisiting previously seen solutions. A neighbour is defined as a swap of two randomly selected rectangles within the solution sequence. During the swap, we also rotate the first randomly selected rectangle with a probability of 50%.

The process is summarised as follows: create five neighbours of the current solution that are not found within the tabu list, evaluate these neighbours using the bottom-left-fill heuristic and add them to the tabu list. The current solution becomes the neighbour with the best evaluation and the process repeats. At the end of the search the best solution seen is returned. For our experiments we initialise the tabu search with an initial solution containing rectangles sorted by decreasing height.

### Simulated Annealing

Our simulated annealing cooling scheme is reliant on the progress of the search. We accept worse solutions with a probability of:  $P(\text{accept}) = 1 - (\Delta E/T)$  where  $\Delta E$  is the change in solution evaluation quality from the current solution and  $T$  is the temperature. Initially, we set  $T = 3$ . This value was established after a series of experiments. Better solutions are always accepted. The cooling operates after every iteration based on whether we accept a neighbouring solution. If we accept, then we geometrically cool the temperature using a multiplier of 0.999. However, if the neighbouring solution is not accepted then we heat the temperature by a multiplier of 1.0001. These values were chosen through initial testing and have the effect of cooling quickly if we are accepting many solutions (high temperature) and cooling more slowly when fewer solutions are accepted. As the search progresses, the temperature may become stable due to the rejection of more solutions thus generating a more frequent heating process. However, when the search moves to explore a different area of the search space the temperature may increase or decrease to reflect the acceptance occurring within this new region. We find a neighbouring solution by a random swap and an orientation flip with a probability of 50% of the first random rectangle chosen. The process is summarised as follows: find one neighbour of the current solution, evaluate the neighbour using bottom-left-fill and find the change in solution quality. If we accept the neighbour, we store it as the current solution and cool. If rejected, we keep the current solution and heat. Once again, the initial solution supplied is that of the input rectangles sorted by decreasing height and the best solution seen during the

search is returned at the end. Simulated annealing techniques have also been applied to the orthogonal stock cutting problem in Lai and Chan (1996).

### **Genetic Algorithm**

The genetic algorithm we employed was created using a population size of 30 individuals where each individual is a sequence of rectangles. Initially we fill the population with randomly generated orderings except one individual that is seeded with a height decreasing sorted ordering. All of the individuals are decoded and evaluated using the bottom-left-fill heuristic. We improve the population by breeding pairs of individuals to produce a new population by favouring better solutions to act as parents. The population is sorted by evaluation order which goes from best to worst and then we use linearly normalised roulette wheel selection to choose parents so that better solutions are favoured but worse solutions may still have a small chance of being selected. These parent solutions then undergo crossover with a probability of 0.6. We use two crossover techniques: i) partially-matched crossover and ii) order-based crossover with each crossover method having an equal chance of being chosen when breeding. Then we use two mutation operators each with a probability of 0.03. The first mutation operator randomly swaps two rectangles within an ordering and the second flips the orientation of a rectangle. The values for population size, crossover, mutation, and elitism have been chosen based on initial testing. The process is summarised as follows: evaluate every individual in the population using bottom-left-fill, keep the five best individuals, fill remaining elements by selection and crossover and apply mutation to the new population. The best solution encountered during the process is returned when the genetic algorithm is terminated. Other orthogonal approaches that utilise genetic algorithms can be found in Kroger (1995), Falkenauer (1996), Jakobs (1996), Ramesh Babu and Ramesh Babu (1999), Hopper and Turton (1999) and Valenzuela and Wang (2001).

### **A. 2. Value of the $m$ Variable (see section 2.3 of the main article)**

The first experiments varied the value of the phase switch variable,  $m$ , in order to test our assumption that a value in the range  $0 < m < 50$  should produce better results. We used the following values: 0, 5, 10, 20, 30, 40, 50, 60, and 70 on a subset of the test problems using tabu search, simulated annealing, and genetic algorithms. We have chosen four different data sets to ensure a range of problems sizes, sheet widths, and rectangle sizes. For each test, we allow each metaheuristic method a 60 second duration and report the average solution evaluation of 10 runs. Table A displays the results for each method where the best average is shown in bold type. From these results, the best setting for  $m$  is consistently between 20 and 40 for these sets of data and a 60 second run. The average result returned over the range of  $m$  values is shown in the graphs of figure A. At lower values, the metaheuristics are not given enough shapes to be able to make significant improvements on the best-fit result. Larger values of  $m$  seem to impair the metaheuristic's ability because of the larger search spaces but may produce better solutions if a greater execution time were allowed (see sections 4.2 and 4.3 of the main article).

| Problem                               | Optimal Evaluation                                    | m Value | Average Evaluation (10 runs) |            |         |            |         |            |
|---------------------------------------|-------------------------------------------------------|---------|------------------------------|------------|---------|------------|---------|------------|
|                                       |                                                       |         | Tabu                         |            | SA      |            | GA      |            |
|                                       |                                                       |         | Eval                         | % Over Opt | Eval    | % Over Opt | Eval    | % Over Opt |
| Hopper<br>C6P1<br>(97 shapes)         | 240                                                   | 0       | 244.01                       | 1.67       | 244.01  | 1.67       | 244.01  | 1.67       |
|                                       |                                                       | 5       | 243.98                       | 1.66       | 243.98  | 1.66       | 243.98  | 1.66       |
|                                       |                                                       | 10      | 243.88                       | 1.62       | 243.88  | 1.62       | 243.88  | 1.62       |
|                                       |                                                       | 20      | 242.70                       | 1.13       | 242.69  | 1.12       | 242.73  | 1.14       |
|                                       |                                                       | 30      | 242.66                       | 1.11       | 242.71  | 1.13       | 243.15  | 1.31       |
|                                       |                                                       | 40      | 243.03                       | 1.26       | 243.47  | 1.45       | 244.08  | 1.70       |
|                                       |                                                       | 50      | 243.57                       | 1.49       | 244.05  | 1.69       | 244.95  | 2.06       |
|                                       |                                                       | 70      | 243.25                       | 1.35       | 244.54  | 1.89       | 245.95  | 2.48       |
| Hopper<br>C7P1<br>(196 shapes)        | 480                                                   | 0       | 489.12                       | 1.90       | 489.12  | 1.90       | 489.12  | 1.90       |
|                                       |                                                       | 5       | 489.12                       | 1.90       | 489.12  | 1.90       | 489.12  | 1.90       |
|                                       |                                                       | 10      | 489.71                       | 2.02       | 489.71  | 2.02       | 489.71  | 2.02       |
|                                       |                                                       | 20      | 487.72                       | 1.61       | 487.65  | 1.59       | 487.71  | 1.61       |
|                                       |                                                       | 30      | 487.70                       | 1.60       | 487.74  | 1.61       | 488.11  | 1.69       |
|                                       |                                                       | 40      | 487.59                       | 1.58       | 487.69  | 1.60       | 488.50  | 1.77       |
|                                       |                                                       | 50      | 488.10                       | 1.69       | 488.58  | 1.79       | 488.26  | 1.72       |
|                                       |                                                       | 70      | 487.63                       | 1.59       | 488.89  | 1.85       | 489.29  | 1.93       |
| Valenzuela<br>Nice P4<br>(200 shapes) | 200                                                   | 0       | 209.63                       | 4.82       | 209.63  | 4.82       | 209.63  | 4.82       |
|                                       |                                                       | 5       | 209.54                       | 4.77       | 209.54  | 4.77       | 209.54  | 4.77       |
|                                       |                                                       | 10      | 209.11                       | 4.55       | 209.11  | 4.55       | 209.11  | 4.55       |
|                                       |                                                       | 20      | 207.50                       | 3.75       | 207.14  | 3.57       | 207.64  | 3.82       |
|                                       |                                                       | 30      | 207.48                       | 3.74       | 207.38  | 3.69       | 208.07  | 4.03       |
|                                       |                                                       | 40      | 207.81                       | 3.91       | 208.21  | 4.10       | 208.39  | 4.19       |
|                                       |                                                       | 50      | 208.01                       | 4.00       | 208.51  | 4.26       | 208.94  | 4.47       |
|                                       |                                                       | 70      | 208.52                       | 4.26       | 209.80  | 4.90       | 209.41  | 4.71       |
| NewData<br>MT2<br>(150 shapes)        | Optimal<br>Not Known<br>(Lower Bound<br>Eval =1521.8) | 0       | 1557.27                      | 2.33       | 1557.27 | 2.33       | 1557.27 | 2.33       |
|                                       |                                                       | 5       | 1552.70                      | 2.03       | 1552.70 | 2.03       | 1552.70 | 2.03       |
|                                       |                                                       | 10      | 1552.77                      | 2.03       | 1552.77 | 2.03       | 1552.77 | 2.03       |
|                                       |                                                       | 20      | 1553.47                      | 2.08       | 1549.90 | 1.85       | 1553.30 | 2.07       |
|                                       |                                                       | 30      | 1544.01                      | 1.46       | 1544.06 | 1.46       | 1545.14 | 1.53       |
|                                       |                                                       | 40      | 1546.37                      | 1.61       | 1544.71 | 1.51       | 1548.27 | 1.74       |
|                                       |                                                       | 50      | 1548.63                      | 1.76       | 1547.78 | 1.71       | 1556.38 | 2.27       |
|                                       |                                                       | 70      | 1548.67                      | 1.77       | 1549.93 | 1.85       | 1557.56 | 2.35       |
|                                       |                                                       | 70      | 1549.80                      | 1.84       | 1552.92 | 2.04       | 1561.85 | 2.63       |

Table A. Varying the phase switch parameter,  $m$

Other problem specific factors may also be important such as the sheet width, rectangle sizes, and more importantly the quantity of wasted space that is inherited from the result given by the best-fit heuristic. Due to these results we fix the value of  $m$  at 30 for our experiments on the literature benchmark problems in section 4.1 of the main article.

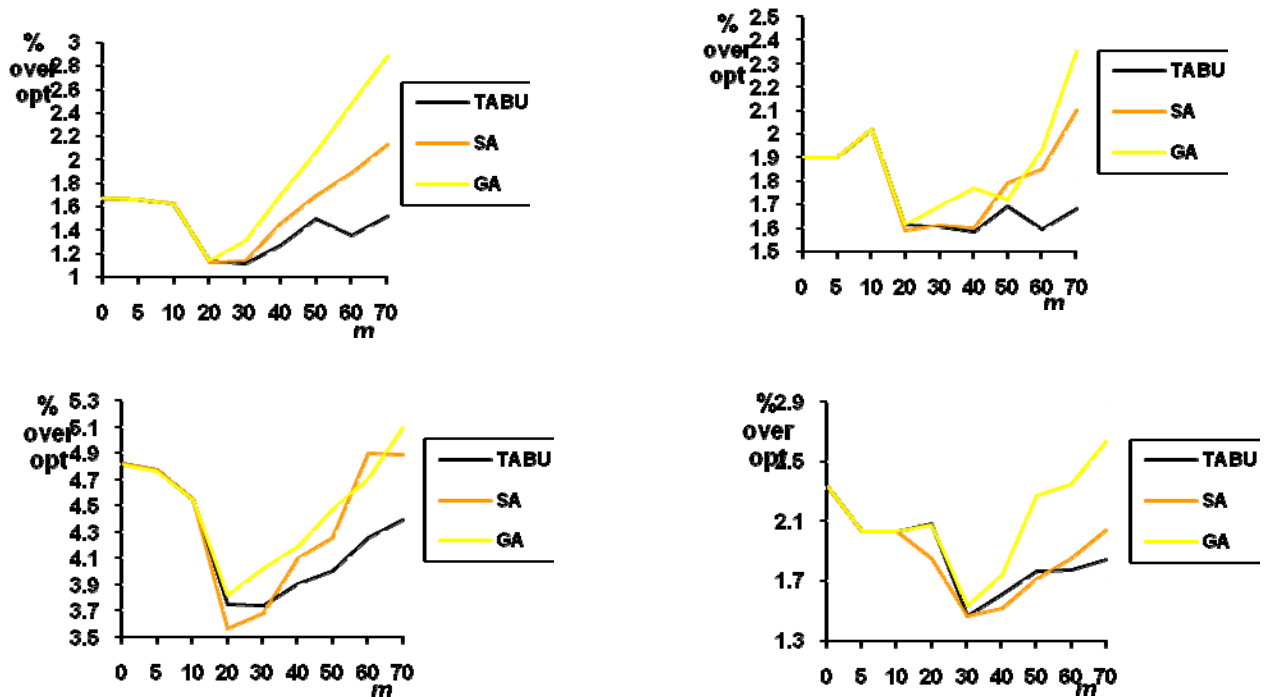

Figure A. Comparison graphs of the percentage above optimal when varying phase switch,  $m$

A. 3. Full Experiments on Literature Benchmark Problems (see section 4.1 of the main article)

| Data Set                        | Cat. | Prob | No. Shapes | Opt Height | Opt Eval | Best-Fit + Metaheuristic Bottom-Left-Fill |         |        |               |         |        |               |                     |         |        |               |                    |         |        | Best Sol. % Over Optimal |             |             |             |             |
|---------------------------------|------|------|------------|------------|----------|-------------------------------------------|---------|--------|---------------|---------|--------|---------------|---------------------|---------|--------|---------------|--------------------|---------|--------|--------------------------|-------------|-------------|-------------|-------------|
|                                 |      |      |            |            |          | Best-Fit                                  |         |        | Tabu Search   |         |        |               | Simulated Annealing |         |        |               | Genetic Algorithms |         |        |                          | BF          | BF + Tabu   | BF + SA     | BF + GA     |
|                                 |      |      |            |            |          | Solution Obtained                         |         |        | Best Solution |         |        | Avr. Eval     | Best Solution       |         |        | Avr. Eval     | Best Solution      |         |        | Avr. Eval                |             |             |             |             |
|                                 |      |      |            |            |          | Height                                    | Area    | Eval.  | Height        | Area    | Eval.  |               | Height              | Area    | Eval.  |               | Height             | Area    | Eval.  |                          | Height      | Area        | Eval.       |             |
| Hopper and Turton (2001)        | C1   | P1   | 16         | 20         | 40       | 21                                        | 410     | 41.50  | 20            | 400     | 40.00  | 40.71         | 20                  | 400     | 40.00  | <b>40.00</b>  | 20                 | 400     | 40.00  | 40.60                    | 3.75        | <b>0.00</b> | <b>0.00</b> | <b>0.00</b> |
|                                 |      | P2   | 17         | 20         | 40       | 22                                        | 400     | 42.00  | 21            | 400     | 41.00  | 41.02         | 20                  | 400     | 40.00  | <b>40.50</b>  | 21                 | 400     | 41.00  | 41.00                    | 5.00        | 2.50        | <b>0.00</b> | 2.50        |
|                                 |      | P3   | 16         | 20         | 40       | 24                                        | 400     | 44.00  | 20            | 400     | 40.00  | 40.61         | 20                  | 400     | 40.00  | <b>40.00</b>  | 20                 | 400     | 40.00  | 40.70                    | 10.00       | <b>0.00</b> | <b>0.00</b> | <b>0.00</b> |
|                                 | C2   | P1   | 25         | 15         | 30       | 16                                        | 609     | 31.23  | 16            | 600     | 31.00  | 31.02         | 16                  | 600     | 31.00  | <b>31.00</b>  | 16                 | 600     | 31.00  | 31.02                    | 4.08        | <b>3.33</b> | <b>3.33</b> | <b>3.33</b> |
|                                 |      | P2   | 25         | 15         | 30       | 16                                        | 600     | 31.00  | 16            | 600     | 31.00  | 31.01         | 16                  | 600     | 31.00  | <b>31.00</b>  | 16                 | 600     | 31.00  | 31.00                    | <b>3.33</b> | 3.33        | 3.33        | 3.33        |
|                                 |      | P3   | 25         | 15         | 30       | 16                                        | 604     | 31.10  | 16            | 600     | 31.00  | <b>31.00</b>  | 16                  | 600     | 31.00  | <b>31.00</b>  | 16                 | 600     | 31.00  | 31.01                    | 3.67        | <b>3.33</b> | <b>3.33</b> | <b>3.33</b> |
|                                 | C3   | P1   | 28         | 30         | 60       | 32                                        | 1814    | 62.23  | 31            | 1810    | 61.17  | 61.95         | 31                  | 1818    | 61.30  | <b>61.59</b>  | 31                 | 1823    | 61.38  | 61.98                    | 3.72        | <b>1.94</b> | 2.17        | 2.31        |
|                                 |      | P2   | 29         | 30         | 60       | 34                                        | 1801    | 64.02  | 32            | 1800    | 62.00  | 62.06         | 31                  | 1814    | 61.23  | <b>61.72</b>  | 32                 | 1809    | 62.15  | 62.49                    | 6.69        | 3.33        | <b>2.06</b> | 3.58        |
|                                 |      | P3   | 28         | 30         | 60       | 33                                        | 1806    | 63.10  | 31            | 1826    | 61.43  | 61.98         | 31                  | 1808    | 61.13  | <b>61.46</b>  | 31                 | 1826    | 61.43  | 62.15                    | 5.17        | 2.39        | <b>1.89</b> | 2.39        |
|                                 | C4   | P1   | 49         | 60         | 120      | 63                                        | 3623    | 123.38 | 62            | 3622    | 122.37 | 122.51        | 61                  | 3621    | 121.35 | <b>122.08</b> | 62                 | 3623    | 122.38 | 122.75                   | 2.82        | 1.97        | <b>1.13</b> | 1.99        |
|                                 |      | P2   | 49         | 60         | 120      | 62                                        | 3621    | 122.35 | 62            | 3617    | 122.28 | 122.46        | 61                  | 3618    | 121.30 | <b>122.20</b> | 62                 | 3624    | 122.40 | 122.90                   | 1.96        | 1.90        | <b>1.08</b> | 2.00        |
|                                 |      | P3   | 49         | 60         | 120      | 62                                        | 3621    | 122.35 | 61            | 3616    | 121.27 | 122.01        | 61                  | 3608    | 121.13 | <b>121.53</b> | 62                 | 3610    | 122.17 | 122.34                   | 1.96        | 1.06        | <b>0.94</b> | 1.81        |
|                                 | C5   | P1   | 72         | 90         | 180      | 93                                        | 5444    | 183.73 | 92            | 5415    | 182.25 | 182.40        | 91                  | 5419    | 181.32 | <b>182.33</b> | 92                 | 5432    | 182.53 | 182.74                   | 2.07        | 1.25        | <b>0.73</b> | 1.41        |
|                                 |      | P2   | 73         | 90         | 180      | 92                                        | 5413    | 182.22 | 92            | 5414    | 182.23 | 182.52        | 91                  | 5410    | 181.17 | <b>182.18</b> | 92                 | 5422    | 182.37 | 182.94                   | 1.23        | 1.24        | <b>0.65</b> | 1.31        |
|                                 |      | P3   | 72         | 90         | 180      | 93                                        | 5469    | 184.15 | 92            | 5437    | 182.62 | <b>182.72</b> | 92                  | 5438    | 182.63 | <b>182.79</b> | 92                 | 5446    | 182.77 | 182.91                   | 2.31        | <b>1.45</b> | 1.46        | 1.54        |
|                                 | C6   | P1   | 97         | 120        | 240      | 123                                       | 9681    | 244.01 | 122           | 9648    | 242.60 | <b>242.75</b> | 122                 | 9652    | 242.65 | 242.80        | 122                | 9678    | 242.98 | 243.33                   | 1.67        | <b>1.08</b> | 1.10        | 1.24        |
|                                 |      | P2   | 97         | 120        | 240      | 122                                       | 9632    | 242.40 | 121           | 9632    | 241.40 | 241.93        | 121                 | 9632    | 241.40 | <b>241.42</b> | 121                | 9634    | 241.43 | 241.84                   | 1.00        | <b>0.58</b> | <b>0.58</b> | 0.59        |
|                                 |      | P3   | 97         | 120        | 240      | 124                                       | 9664    | 244.80 | 122           | 9645    | 242.56 | <b>242.60</b> | 122                 | 9647    | 242.59 | 242.63        | 122                | 9649    | 242.61 | 242.68                   | 2.00        | <b>1.07</b> | 1.08        | 1.09        |
|                                 | C7   | P1   | 196        | 240        | 480      | 246                                       | 38899   | 489.12 | 245           | 38818   | 487.61 | <b>487.70</b> | 244                 | 38839   | 486.74 | 487.75        | 245                | 38855   | 487.84 | 488.47                   | 1.90        | 1.59        | <b>1.40</b> | 1.63        |
|                                 |      | P2   | 197        | 240        | 480      | 244                                       | 38715   | 485.97 | 244           | 38663   | 485.64 | <b>485.73</b> | 244                 | 38667   | 485.67 | 487.02        | 244                | 38699   | 485.87 | 486.70                   | 1.24        | <b>1.18</b> | <b>1.18</b> | 1.22        |
|                                 |      | P3   | 196        | 240        | 480      | 245                                       | 38864   | 487.90 | 245           | 38853   | 487.83 | 488.74        | 245                 | 38850   | 487.81 | <b>488.17</b> | 245                | 38858   | 487.86 | 488.75                   | 1.65        | <b>1.63</b> | <b>1.63</b> | 1.64        |
| Valenzuela and Wang (2001)      | Nice | P1   | 25         | 100        | 200      | 107.99                                    | 10267.7 | 210.67 | 106.93        | 10242.0 | 209.35 | 210.70        | 104.024             | 10049.5 | 204.52 | 207.25        | 108.42             | 10190.1 | 210.33 | 211.30                   | 5.33        | 4.67        | <b>2.26</b> | 5.16        |
|                                 |      | P2   | 50         | 100        | 200      | 109.69                                    | 10423.8 | 213.93 | 106.64        | 10388.5 | 210.53 | 211.10        | 104.413             | 10221.0 | 206.62 | 208.24        | 106.87             | 10409.4 | 210.97 | 212.59                   | 6.97        | 5.26        | <b>3.31</b> | 5.48        |
|                                 |      | P3   | 100        | 100        | 200      | 107.92                                    | 10273.2 | 210.65 | 105.23        | 10276.1 | 207.99 | 208.45        | 105.04              | 10335.0 | 208.39 | 208.69        | 105.94             | 10336.3 | 209.31 | 211.11                   | 5.33        | <b>4.00</b> | 4.19        | 4.65        |
|                                 |      | P4   | 200        | 100        | 200      | 106.89                                    | 10274.1 | 209.63 | 104.21        | 10288.1 | 207.09 | 207.39        | 104.743             | 10266.7 | 207.41 | 207.59        | 104.89             | 10307.8 | 207.97 | 208.90                   | 4.82        | <b>3.55</b> | 3.71        | 3.98        |
|                                 |      | P5   | 500        | 100        | 200      | 103.39                                    | 10195.4 | 205.35 | 103.18        | 10193.4 | 205.11 | 205.89        | 103.507             | 10199.3 | 205.50 | 206.01        | 103.48             | 10197.7 | 205.46 | 206.25                   | 2.67        | <b>2.56</b> | 2.75        | 2.73        |
|                                 |      | P6   | 1000       | 100        | 200      | 103.84                                    | 10267.6 | 206.52 | 103.80        | 10268.2 | 206.48 | 206.73        | 103.756             | 10269.8 | 206.45 | 206.72        | 103.80             | 10271.7 | 206.52 | 207.02                   | 3.26        | 3.24        | <b>3.23</b> | 3.26        |
|                                 | Path | P1   | 25         | 100        | 200      | 110.19                                    | 10253.7 | 212.73 | 105.82        | 10345.9 | 209.28 | 209.87        | 103.09              | 10038.3 | 203.47 | 207.21        | 108.17             | 10250.6 | 210.68 | 212.88                   | 6.36        | 4.64        | <b>1.74</b> | 5.34        |
|                                 |      | P2   | 50         | 100        | 200      | 113.65                                    | 10285.1 | 216.50 | 103.66        | 10080.2 | 204.46 | 204.79        | 103.4               | 10060.9 | 204.01 | 204.59        | 103.66             | 10085.0 | 204.51 | 204.92                   | 8.25        | 2.23        | <b>2.00</b> | 2.26        |
|                                 |      | P3   | 100        | 100        | 200      | 106.75                                    | 10180.6 | 208.56 | 104.73        | 10084.9 | 205.58 | 206.47        | 103.037             | 10125.7 | 204.29 | 205.92        | 104.37             | 10217.6 | 206.55 | 207.52                   | 4.28        | 2.79        | <b>2.15</b> | 3.27        |
|                                 |      | P4   | 200        | 100        | 200      | 104.12                                    | 10157.4 | 205.70 | 103.53        | 10058.3 | 204.11 | 204.51        | 103.419             | 10116.1 | 204.58 | 204.63        | 103.85             | 10068.3 | 204.53 | 204.73                   | 2.85        | <b>2.06</b> | 2.29        | 2.26        |
|                                 |      | P5   | 500        | 100        | 200      | 103.81                                    | 10189.0 | 205.70 | 103.15        | 10210.4 | 205.25 | 205.38        | 103.479             | 10200.1 | 205.48 | 205.60        | 103.41             | 10209.0 | 205.50 | 206.22                   | 2.85        | <b>2.63</b> | 2.74        | 2.75        |
|                                 |      | P6   | 1000       | 100        | 200      | 103.09                                    | 10173.0 | 204.82 | 102.80        | 10162.1 | 204.42 | 204.69        | 102.867             | 10165.0 | 204.52 | 204.68        | 102.90             | 10169.1 | 204.59 | 205.11                   | 2.41        | <b>2.21</b> | 2.26        | 2.30        |
| Ramesh Babu                     | P1   | 50   | 375        | 750        | 400      | 378125                                    | 778.13  | 400    | 367875        | 767.88  | 767.88 | 400           | 367875              | 767.88  | 767.88 | 400           | 367875             | 767.88  | 767.96 | 3.75                     | <b>2.38</b> | <b>2.38</b> | <b>2.38</b> |             |
| Burke, Kendall, Whitwell (2004) | N1   | 10   | 40         | 80         | 45       | 1800                                      | 90.00   | 40     | 1600          | 80.00   | 80.00  | 40            | 1600                | 80.00   | 80.00  | 40            | 1600               | 80.00   | 80.00  | 12.50                    | <b>0.00</b> | <b>0.00</b> | <b>0.00</b> |             |
|                                 | N2   | 20   | 50         | 100        | 53       | 1542                                      | 104.40  | 50     | 1500          | 100.00  | 101.68 | 50            | 1500                | 100.00  | 101.68 | 50            | 1500               | 100.00  | 102.01 | 4.40                     | <b>0.00</b> | <b>0.00</b> | <b>0.00</b> |             |
|                                 | N3   | 30   | 50         | 100        | 52       | 1525                                      | 102.83  | 51     | 1503          | 101.10  | 101.51 | 51            | 1500                | 101.00  | 101.32 | 52            | 1508               | 102.27  | 102.13 | 2.83                     | 1.10        | <b>1.00</b> | 2.27        |             |
|                                 | N4   | 40   | 80         | 160        | 86       | 6547                                      | 167.84  | 83     | 6437          | 163.46  | 163.70 | 82            | 6455                | 162.69  | 163.50 | 83            | 6443               | 163.54  | 163.82 | 4.90                     | 2.16        | <b>1.68</b> | 2.21        |             |
|                                 | N5   | 50   | 100        | 200        | 105      | 10154                                     | 206.54  | 103    | 10124         | 204.24  | 204.34 | 103           | 10122               | 204.22  | 204.29 | 104           | 10112              | 205.12  | 205.48 | 3.27                     | 2.12        | <b>2.11</b> | 2.56        |             |
|                                 | N6   | 60   | 100        | 200        | 102      | 5061                                      | 203.22  | 102    | 5047          | 202.94  | 202.95 | 102           | 5047                | 202.94  | 202.94 | 102           | 5047               | 202.94  | 202.97 | 1.61                     | <b>1.47</b> | <b>1.47</b> | <b>1.47</b> |             |
|                                 | N7   | 70   | 100        | 200        | 108      | 8230                                      | 210.88  | 105    | 8094          | 206.18  | 206.26 | 104           | 8117                | 205.46  | 205.97 | 104           | 8113               | 205.41  | 206.30 | 5.44                     | 3.09        | 2.73        | <b>2.71</b> |             |
|                                 | N8   | 80   | 80         | 160        | 83       | 8116                                      | 164.16  | 82     | 8097          | 162.97  | 162.97 | 82            | 8097                | 162.97  | 162.97 | 82            | 8097               | 162.97  | 162.97 | 2.60                     | <b>1.86</b> | <b>1.86</b> | <b>1.86</b> |             |
|                                 | N9   | 100  | 150        | 300        | 152      | 7556                                      | 303.12  | 152    | 7544          | 302.88  | 317.88 | 152           | 7544                | 302.88  | 317.88 | 152           | 7544               | 302.88  | 317.92 | 1.04                     | 0.96        | 0.96        | 0.96        |             |
|                                 | N10  | 200  | 150        | 300        | 152      | 10567                                     | 302.96  | 152    | 10570         | 303.00  | 303.00 | 152           | 10570               | 303.00  | 303.00 | 152           | 10570              | 303.00  | 303.00 | <b>0.99</b>              | 1.00        | 1.00        | 1.00        |             |
|                                 | N11  | 300  | 150        | 300        | 153      | 10586                                     | 304.23  | 153    | 10586         | 304.23  | 304.23 | 153           | 10586               | 304.23  | 304.23 | 153           | 10586              | 304.23  | 304.23 | <b>1.41</b>              | 1.41        | 1.41        | 1.41        |             |
|                                 | N12  | 500  | 300        | 600        | 306      | 30431                                     | 610.31  | 306    | 30431         | 610.31  | 610.31 | 306           | 30431               | 610.31  | 610.31 | 306           | 30431              | 610.31  | 610.31 | <b>1.72</b>              | 1.72        | 1.72        | 1.72        |             |
|                                 | N13  | 3152 | 960        | 1920       | 964      | 615637                                    | 1925.9  | 964    | 615637        | 1925.9  | 1925.9 | 964           | 615629              | 1925.9  |        |               |                    |         |        |                          |             |             |             |             |

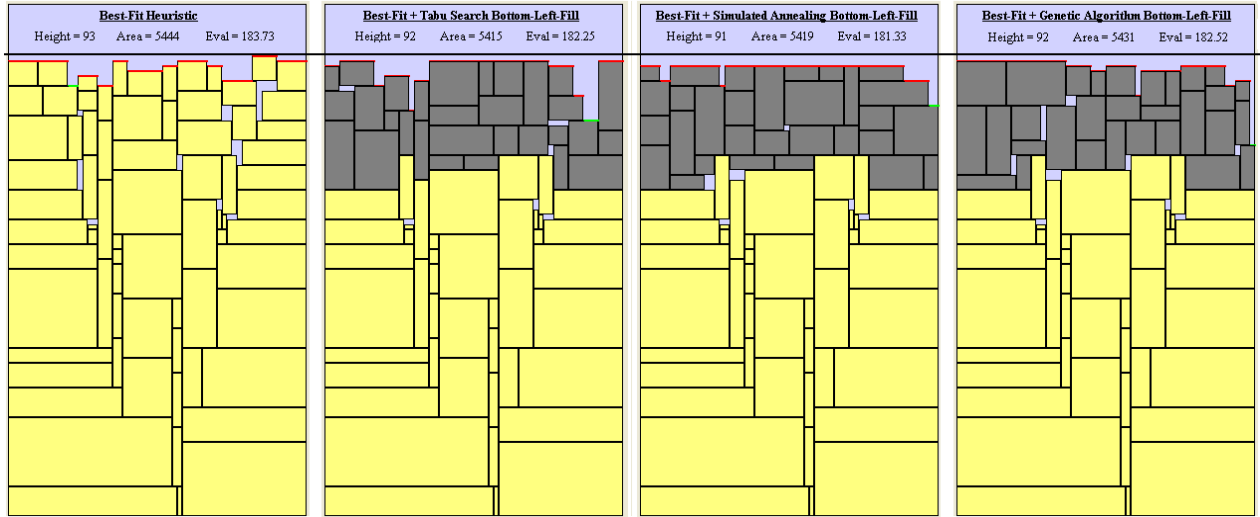

**Figure B.** Solutions obtained by solitary best-fit heuristic, best-fit with tabu bottom-left-fill, best-fit with simulated annealing bottom-left-fill, and best-fit with genetic algorithm bottom-left-fill on problem C5P1.

#### A. 4. Full Extended Experiments on Literature Benchmark Problems (see section 4.2 of the main article)

| Test Data Set | Size | Best-Fit Heuristic |               |               | Best-Fit + Metaheuristic Bottom-Left-Fill ( $m = 150$ , 5 min run) |               |               |           |                     |               |               |           |                   |               |               |           |
|---------------|------|--------------------|---------------|---------------|--------------------------------------------------------------------|---------------|---------------|-----------|---------------------|---------------|---------------|-----------|-------------------|---------------|---------------|-----------|
|               |      | Best Solution      |               |               | Tabu Search                                                        |               |               |           | Simulated Annealing |               |               |           | Genetic Algorithm |               |               |           |
|               |      | Height             | Area          | Eval          | Height                                                             | Area          | Eval          | Avr. Eval | Height              | Area          | Eval          | Avr. Eval | Height            | Area          | Eval          | Avr. Eval |
|               |      |                    |               |               |                                                                    |               |               |           |                     |               |               |           |                   |               |               |           |
| C2P2          | 25   | 16                 | 600           | 31.00         | <b>15</b>                                                          | <b>600</b>    | <b>30.00</b>  | 30.90     | <b>15</b>           | <b>600</b>    | <b>30.00</b>  | 30.80     | 16                | 600           | 31.00         | 31.00     |
| N10           | 200  | 152                | 10567         | 302.96        | <b>151</b>                                                         | <b>10530</b>  | <b>301.43</b> | 302.07    | 152                 | 10551         | 302.73        | 302.77    | 152               | 10590         | 303.29        | 303.36    |
| N11           | 300  | 153                | 10586         | 304.23        | 152                                                                | 10585         | 303.21        | 303.23    | <b>152</b>          | <b>10581</b>  | <b>303.16</b> | 303.20    | 152               | 10589         | 303.27        | 303.30    |
| N12           | 500  | 306                | 30431         | 610.31        | <b>304</b>                                                         | <b>30281</b>  | <b>606.81</b> | 606.86    | 304                 | 30288         | 606.88        | 607.00    | 304               | 30291         | 606.91        | 607.20    |
| N13           | 3152 | <b>964</b>         | <b>615637</b> | <b>1925.9</b> | <b>964</b>                                                         | <b>615637</b> | <b>1925.9</b> | 1925.9    | <b>964</b>          | <b>615637</b> | <b>1925.9</b> | 1925.9    | <b>964</b>        | <b>615637</b> | <b>1925.9</b> | 1925.9    |

**Table C.** Results of extended experiments using  $m = 150$  and run times of 5 minutes

### A. 5. Full Experiments on New Test Problems (see section 4.3 of the main article)

| Data Set | No. of Shapes | Phase Switch $m$ | Best-Fit + Metaheuristic Bottom-Left-Fill |           |         |           |                     |           |         |           |                    |           |         |           |
|----------|---------------|------------------|-------------------------------------------|-----------|---------|-----------|---------------------|-----------|---------|-----------|--------------------|-----------|---------|-----------|
|          |               |                  | Tabu Search                               |           |         |           | Simulated Annealing |           |         |           | Genetic Algorithms |           |         |           |
|          |               |                  | Best Solution                             |           |         | Avr. Eval | Best Solution       |           |         | Avr. Eval | Best Solution      |           |         | Avr. Eval |
|          |               |                  | Height                                    | Area      | Eval.   |           | Height              | Area      | Eval.   |           | Height             | Area      | Eval.   |           |
| MT1      | 100           | 30               | 505.05                                    | 198672.2  | 1001.73 | 1002.52   | 503.08              | 198729.6  | 999.90  | 1001.28   | 506.10             | 199240.2  | 1004.20 | 1004.80   |
|          |               | 50               | 502.50                                    | 198926.4  | 999.82  | 1001.97   | 501.38              | 199053.4  | 999.01  | 1001.31   | 508.30             | 200137.3  | 1008.64 | 1009.30   |
|          |               | 100              | 504.30                                    | 199886.0  | 1004.02 | 1007.24   | 504.50              | 199437.8  | 1003.09 | 1006.92   | 516.40             | 200379.8  | 1017.35 | 1017.35   |
| MT2      | 150           | 30               | 773.70                                    | 231121.1  | 1544.10 | 1545.99   | 775.20              | 231146.9  | 1545.69 | 1549.14   | 776.50             | 231554.6  | 1548.35 | 1549.88   |
|          |               | 50               | 775.00                                    | 231083.9  | 1545.28 | 1548.12   | 774.00              | 230946.8  | 1543.82 | 1548.40   | 783.20             | 231162.7  | 1553.74 | 1555.70   |
|          |               | 100              | 783.40                                    | 232513.5  | 1558.45 | 1562.37   | 781.50              | 232762.1  | 1557.37 | 1560.56   | 798.50             | 235898.6  | 1584.83 | 1592.19   |
| MT3      | 200           | 30               | 795.70                                    | 314251.7  | 1581.33 | 1583.14   | 793.20              | 313991.5  | 1578.18 | 1582.21   | 798.90             | 314288.2  | 1584.62 | 1586.73   |
|          |               | 50               | 795.80                                    | 314391.0  | 1581.78 | 1583.07   | 794.00              | 313337.4  | 1577.34 | 1581.23   | 803.60             | 314885.5  | 1590.81 | 1594.01   |
|          |               | 100              | 791.00                                    | 313942.5  | 1575.86 | 1578.53   | 793.00              | 313505.3  | 1576.76 | 1580.67   | 801.70             | 316915.2  | 1593.99 | 1594.43   |
| MT4      | 300           | 30               | 1201.00                                   | 714758.0  | 2392.26 | 2393.45   | 1199.00             | 714773.0  | 2390.29 | 2390.97   | 1201.00            | 715017.0  | 2392.70 | 2393.43   |
|          |               | 50               | 1199.00                                   | 714822.0  | 2390.37 | 2392.27   | 1200.00             | 715022.0  | 2391.70 | 2392.79   | 1202.00            | 715905.0  | 2395.18 | 2396.07   |
|          |               | 100              | 1208.00                                   | 717337.0  | 2403.56 | 2411.83   | 1211.00             | 720719.0  | 2412.20 | 2414.83   | 1220.00            | 722800.0  | 2424.67 | 2424.67   |
| MT5      | 500           | 30               | 1286.60                                   | 1020366.1 | 2562.06 | 2564.07   | 1286.60             | 1020656.6 | 2562.42 | 2563.63   | 1290.70            | 1021301.9 | 2567.33 | 2568.57   |
|          |               | 50               | 1283.40                                   | 1020694.3 | 2559.27 | 2561.12   | 1283.10             | 1021290.7 | 2559.71 | 2563.03   | 1288.60            | 1022191.4 | 2566.34 | 2568.91   |
|          |               | 100              | 1286.20                                   | 1021081.4 | 2562.55 | 2564.61   | 1285.00             | 1022023.3 | 2562.53 | 2564.48   | 1289.90            | 1023482.0 | 2569.25 | 2569.25   |
| MT6      | 100           | 30               | 513.83                                    | 203341.3  | 1022.18 | 1023.74   | 512.25              | 203351.0  | 1020.63 | 1022.84   | 516.03             | 203903.0  | 1025.79 | 1027.58   |
|          |               | 50               | 516.81                                    | 203893.8  | 1026.54 | 1028.87   | 518.06              | 204174.6  | 1028.49 | 1029.95   | 518.68             | 204745.5  | 1030.55 | 1032.03   |
|          |               | 100              | 526.54                                    | 206505.4  | 1042.80 | 1048.83   | 530.39              | 206802.9  | 1047.39 | 1050.49   | 542.82             | 209445.3  | 1066.43 | 1066.68   |
| MT7      | 150           | 30               | 508.34                                    | 201766.2  | 1012.75 | 1012.87   | 508.16              | 201621.9  | 1012.22 | 1012.67   | 510.05             | 201876.6  | 1014.74 | 1015.14   |
|          |               | 50               | 509.37                                    | 201756.8  | 1013.76 | 1014.59   | 509.29              | 202175.7  | 1014.73 | 1015.69   | 512.98             | 202053.9  | 1018.11 | 1018.76   |
|          |               | 100              | 511.99                                    | 202735.2  | 1018.83 | 1019.77   | 514.16              | 202695.8  | 1020.90 | 1022.02   | 516.50             | 203308.2  | 1024.77 | 1024.77   |
| MT8      | 200           | 30               | 819.02                                    | 406547.5  | 1632.12 | 1632.64   | 818.10              | 406701.3  | 1631.50 | 1632.51   | 820.96             | 407041.2  | 1635.04 | 1635.34   |
|          |               | 50               | 821.99                                    | 406758.8  | 1635.51 | 1637.07   | 821.05              | 406762.7  | 1634.57 | 1635.83   | 825.00             | 407762.5  | 1640.53 | 1641.29   |
|          |               | 100              | 825.45                                    | 407336.5  | 1640.12 | 1642.73   | 823.86              | 406911.6  | 1637.69 | 1642.60   | 830.75             | 409210.7  | 1649.17 | 1650.55   |
| MT9      | 300           | 30               | 816.18                                    | 485304.1  | 1625.02 | 1625.52   | 815.44              | 485287.6  | 1624.26 | 1624.85   | 817.60             | 485334.1  | 1626.49 | 1627.07   |
|          |               | 50               | 816.41                                    | 485611.2  | 1625.77 | 1628.11   | 816.41              | 485544.2  | 1625.65 | 1627.76   | 820.16             | 485996.8  | 1630.16 | 1631.09   |
|          |               | 100              | 896.13                                    | 485051.5  | 1704.55 | 1705.21   | 896.13              | 487239.4  | 1708.19 | 1709.21   | 823.74             | 489353.5  | 1639.33 | 1643.10   |
| MT10     | 500           | 30               | 1515.78                                   | 906963.9  | 3027.38 | 3028.89   | 1516.00             | 906931.1  | 3027.55 | 3028.31   | 1517.75            | 907106.3  | 3029.59 | 3030.54   |
|          |               | 50               | 1517.34                                   | 906915.1  | 3028.87 | 3030.13   | 1520.56             | 907169.7  | 3032.51 | 3032.99   | 1521.41            | 907982.3  | 3034.71 | 3035.82   |
|          |               | 100              | 1524.82                                   | 908585.9  | 3039.13 | 3040.60   | 1526.27             | 908840.3  | 3041.00 | 3042.56   | 1530.77            | 910407.6  | 3048.12 | 3048.77   |

Table D. Best and average results using phase two durations of 60 seconds on the new benchmark problems

| Data Set | No. of Shapes | Phase Switch $m$ | Best-Fit + Metaheuristic Bottom-Left-Fill |           |         |           |                     |           |         |           |                    |           |         |           |
|----------|---------------|------------------|-------------------------------------------|-----------|---------|-----------|---------------------|-----------|---------|-----------|--------------------|-----------|---------|-----------|
|          |               |                  | Tabu Search                               |           |         |           | Simulated Annealing |           |         |           | Genetic Algorithms |           |         |           |
|          |               |                  | Best Solution                             |           |         | Avr. Eval | Best Solution       |           |         | Avr. Eval | Best Solution      |           |         | Avr. Eval |
|          |               |                  | Height                                    | Area      | Eval.   |           | Height              | Area      | Eval.   |           | Height             | Area      | Eval.   |           |
| MT1      | 100           | 30               | 502.78                                    | 198569.3  | 999.20  | 1000.36   | 502.78              | 198626.9  | 999.34  | 1001.36   | 502.78             | 198830.6  | 999.85  | 1002.09   |
|          |               | 50               | 501.38                                    | 198663.1  | 998.04  | 1000.49   | 502.50              | 199153.5  | 1000.38 | 1001.49   | 505.68             | 199635.2  | 1004.77 | 1006.24   |
|          |               | 100              | 505.50                                    | 199195.6  | 1003.49 | 1006.93   | 504.50              | 199024.8  | 1002.06 | 1004.70   | 513.00             | 200670.3  | 1014.68 | 1016.82   |
| MT2      | 150           | 30               | 773.70                                    | 231121.1  | 1544.10 | 1544.60   | 773.70              | 231126.6  | 1544.12 | 1544.80   | 774.00             | 231287.3  | 1544.96 | 1545.82   |
|          |               | 50               | 774.00                                    | 230771.8  | 1543.24 | 1545.41   | 773.20              | 230840.4  | 1542.67 | 1545.88   | 782.30             | 231121.1  | 1552.70 | 1553.47   |
|          |               | 100              | 782.40                                    | 232019.1  | 1555.80 | 1560.46   | 780.90              | 231832.8  | 1553.68 | 1558.23   | 796.70             | 235685.0  | 1582.32 | 1587.04   |
| MT3      | 200           | 30               | 795.10                                    | 313719.0  | 1579.40 | 1580.43   | 793.00              | 313508.1  | 1576.77 | 1579.05   | 798.90             | 313646.3  | 1583.02 | 1585.10   |
|          |               | 50               | 796.50                                    | 313715.2  | 1580.79 | 1582.78   | 796.00              | 313531.9  | 1579.83 | 1582.36   | 799.60             | 315657.6  | 1588.74 | 1590.43   |
|          |               | 100              | 790.70                                    | 313718.7  | 1575.00 | 1576.29   | 790.60              | 312996.5  | 1573.09 | 1578.56   | 802.80             | 314891.6  | 1590.03 | 1593.11   |
| MT4      | 300           | 30               | 1199.00                                   | 714827.0  | 2390.38 | 2391.88   | 1198.00             | 715312.0  | 2390.19 | 2390.45   | 1199.00            | 714839.0  | 2390.40 | 2390.78   |
|          |               | 50               | 1198.00                                   | 714600.0  | 2389.00 | 2390.13   | 1197.00             | 714443.0  | 2387.74 | 2390.25   | 1200.00            | 715764.0  | 2392.94 | 2394.92   |
|          |               | 100              | 1199.00                                   | 715191.0  | 2390.99 | 2392.19   | 1198.00             | 715015.0  | 2389.69 | 2392.50   | 1205.00            | 718542.0  | 2402.57 | 2403.67   |
| MT5      | 500           | 30               | 1286.60                                   | 1020264.6 | 2561.93 | 2562.72   | 1285.60             | 1020681.0 | 2561.45 | 2561.83   | 1289.50            | 1020601.9 | 2565.25 | 2566.71   |
|          |               | 50               | 1282.50                                   | 1020156.8 | 2557.70 | 2558.95   | 1283.20             | 1020722.6 | 2559.10 | 2559.75   | 1288.80            | 1021177.9 | 2565.27 | 2566.14   |
|          |               | 100              | 1284.10                                   | 1021141.7 | 2560.53 | 2561.91   | 1283.40             | 1021242.7 | 2559.95 | 2562.39   | 1289.90            | 1023482.0 | 2569.25 | 2569.25   |
| MT6      | 100           | 30               | 515.03                                    | 203354.7  | 1023.41 | 1023.76   | 512.93              | 203303.9  | 1021.19 | 1022.29   | 514.46             | 203798.8  | 1023.96 | 1025.59   |
|          |               | 50               | 517.43                                    | 204089.1  | 1027.66 | 1028.71   | 518.07              | 204032.7  | 1028.15 | 1029.32   | 515.85             | 204121.6  | 1026.15 | 1029.95   |
|          |               | 100              | 524.08                                    | 206168.9  | 1039.50 | 1046.21   | 527.48              | 206714.3  | 1044.27 | 1047.22   | 533.90             | 209937.2  | 1058.74 | 1063.47   |
| MT7      | 150           | 30               | 508.05                                    | 201628.7  | 1012.12 | 1012.61   | 507.19              | 201631.8  | 1011.27 | 1011.75   | 508.84             | 201698.2  | 1013.09 | 1013.78   |
|          |               | 50               | 508.77                                    | 201837.4  | 1013.36 | 1014.23   | 508.56              | 201864.1  | 1013.22 | 1014.55   | 511.86             | 202116.2  | 1017.15 | 1017.56   |
|          |               | 100              | 511.39                                    | 202443.2  | 1017.50 | 1018.40   | 512.02              | 203152.6  | 1019.91 | 1021.52   | 516.59             | 202982.6  | 1024.05 | 1024.58   |
| MT8      | 200           | 30               | 818.73                                    | 406615.6  | 1631.96 | 1632.11   | 817.93              | 406622.6  | 1631.18 | 1631.53   | 819.74             | 406706.7  | 1633.16 | 1633.80   |
|          |               | 50               | 819.76                                    | 406629.7  | 1633.02 | 1634.14   | 818.11              | 406667.9  | 1631.45 | 1633.72   | 823.59             | 407370.1  | 1638.33 | 1639.70   |
|          |               | 100              | 820.62                                    | 407242.2  | 1635.10 | 1637.84   | 823.91              | 407206.7  | 1638.32 | 1640.44   | 829.48             | 408452.6  | 1646.39 | 1647.62   |
| MT9      | 300           | 30               | 815.00                                    | 485178.9  | 1623.63 | 1624.08   | 814.67              | 485194.4  | 1623.32 | 1623.69   | 816.00             | 485144.7  | 1624.58 | 1625.77   |
|          |               | 50               | 815.81                                    | 485471.6  | 1624.93 | 1626.19   | 814.21              | 485310.4  | 1623.07 | 1626.03   | 817.52             | 486130.0  | 1627.74 | 1629.06   |
|          |               | 100              | 896.13                                    | 484926.6  | 1704.34 | 1704.98   | 820.84              | 485492.0  | 1629.99 | 1676.41   | 824.47             | 488191.5  | 1638.13 | 1640.62   |
| MT10     | 500           | 30               | 1515.76                                   | 906799.0  | 3027.09 | 3027.48   | 1514.95             | 906697.6  | 3026.11 | 3026.62   | 1517.71            | 906998.5  | 3029.37 | 3029.85   |
|          |               | 50               | 1516.68                                   | 906829.1  | 3028.07 | 3029.48   | 1517.93             | 907245.6  | 3030.01 | 3030.71   | 1520.99            | 907669.6  | 3033.78 | 3034.81   |
|          |               | 100              | 1521.59                                   | 908957.4  | 3036.52 | 3037.49   | 1523.89             | 909188.6  | 3039.21 | 3040.59   | 1527.53            | 910011.8  | 3044.21 | 3045.48   |

Table E. Best and average results using phase two durations of 300 seconds on the new benchmark problems

| Data Set | No. of Shapes | Phase Switch $m$ | Best-Fit + Metaheuristic Bottom-Left-Fill |           |         |           |                     |           |         |           |                    |           |         |           |
|----------|---------------|------------------|-------------------------------------------|-----------|---------|-----------|---------------------|-----------|---------|-----------|--------------------|-----------|---------|-----------|
|          |               |                  | Tabu Search                               |           |         |           | Simulated Annealing |           |         |           | Genetic Algorithms |           |         |           |
|          |               |                  | Best Solution                             |           |         | Avr. Eval | Best Solution       |           |         | Avr. Eval | Best Solution      |           |         | Avr. Eval |
|          |               |                  | Height                                    | Area      | Eval.   | Eval      | Height              | Area      | Eval.   | Eval      | Height             | Area      | Eval.   | Eval      |
| MT1      | 100           | 30               | 503.08                                    | 198616.3  | 999.62  | 1000.61   | 503.08              | 198574.8  | 999.51  | 1000.79   | 505.80             | 198630.2  | 1002.38 | 1002.93   |
|          |               | 50               | 502.60                                    | 198995.1  | 1000.09 | 1001.58   | 502.50              | 198559.3  | 998.90  | 999.85    | 504.08             | 199835.3  | 1003.67 | 1005.70   |
|          |               | 100              | 504.78                                    | 199031.6  | 1002.36 | 1007.23   | 502.88              | 199352.5  | 1001.26 | 1002.63   | 516.40             | 200379.8  | 1017.35 | 1017.35   |
| MT2      | 150           | 30               | 774.00                                    | 231117.6  | 1544.39 | 1544.46   | 774.00              | 231059.3  | 1544.20 | 1544.50   | 774.00             | 231126.6  | 1544.42 | 1546.39   |
|          |               | 50               | 774.30                                    | 230803.5  | 1543.65 | 1545.86   | 772.80              | 230876.5  | 1542.39 | 1545.30   | 779.10             | 231039.2  | 1549.23 | 1551.19   |
|          |               | 100              | 781.00                                    | 232070.6  | 1554.57 | 1558.70   | 779.70              | 232071.8  | 1553.27 | 1557.91   | 796.10             | 236024.1  | 1582.85 | 1588.56   |
| MT3      | 200           | 30               | 792.60                                    | 313922.3  | 1577.41 | 1579.66   | 794.10              | 313836.8  | 1578.69 | 1579.80   | 797.40             | 313929.2  | 1582.22 | 1584.12   |
|          |               | 50               | 797.30                                    | 313759.2  | 1581.70 | 1582.84   | 794.00              | 313368.5  | 1577.42 | 1581.48   | 799.40             | 314650.1  | 1586.03 | 1588.58   |
|          |               | 100              | 791.80                                    | 312864.3  | 1573.96 | 1576.73   | 790.30              | 312690.7  | 1572.03 | 1575.14   | 800.70             | 315384.6  | 1589.16 | 1590.92   |
| MT4      | 300           | 30               | 1199.00                                   | 714748.0  | 2390.25 | 2390.75   | 1198.00             | 715012.0  | 2389.69 | 2390.21   | 1198.00            | 715133.0  | 2389.89 | 2390.46   |
|          |               | 50               | 1198.00                                   | 714250.0  | 2388.42 | 2389.62   | 1197.00             | 715158.0  | 2388.93 | 2390.13   | 1200.00            | 715988.0  | 2393.31 | 2393.97   |
|          |               | 100              | 1198.00                                   | 715013.0  | 2389.69 | 2393.16   | 1199.00             | 714488.0  | 2389.81 | 2391.65   | 1206.00            | 717656.0  | 2402.09 | 2403.15   |
| MT5      | 500           | 30               | 1286.60                                   | 1020295.3 | 2561.97 | 2562.05   | 1286.60             | 1020261.4 | 2561.93 | 2563.60   | 1286.60            | 1020758.7 | 2562.55 | 2564.69   |
|          |               | 50               | 1283.20                                   | 1020484.0 | 2558.81 | 2559.26   | 1282.50             | 1020353.7 | 2557.94 | 2559.29   | 1288.08            | 1021134.3 | 2564.50 | 2565.79   |
|          |               | 100              | 1283.10                                   | 1021257.1 | 2559.67 | 2561.09   | 1282.80             | 1020929.0 | 2558.96 | 2561.89   | 1289.90            | 1023482.0 | 2569.25 | 2569.25   |
| MT6      | 100           | 30               | 513.00                                    | 203521.4  | 1021.81 | 1023.18   | 512.77              | 203451.1  | 1021.40 | 1022.17   | 514.15             | 203616.0  | 1023.19 | 1024.34   |
|          |               | 50               | 516.97                                    | 204263.1  | 1027.62 | 1029.26   | 517.17              | 203872.5  | 1026.85 | 1028.06   | 518.83             | 204077.2  | 1029.02 | 1029.78   |
|          |               | 100              | 526.24                                    | 206319.8  | 1042.03 | 1046.47   | 525.25              | 206668.7  | 1041.93 | 1048.11   | 533.59             | 209332.3  | 1056.92 | 1062.14   |
| MT7      | 150           | 30               | 507.71                                    | 201642.4  | 1011.82 | 1012.36   | 507.08              | 201600.3  | 1011.08 | 1011.45   | 508.54             | 201697.6  | 1012.79 | 1013.61   |
|          |               | 50               | 509.67                                    | 201798.9  | 1014.17 | 1014.74   | 508.49              | 202030.2  | 1013.57 | 1014.27   | 510.61             | 202105.7  | 1015.87 | 1016.49   |
|          |               | 100              | 511.54                                    | 202572.1  | 1017.97 | 1019.55   | 512.87              | 203155.2  | 1020.76 | 1022.40   | 515.42             | 203108.3  | 1023.19 | 1024.29   |
| MT8      | 200           | 30               | 817.83                                    | 406818.4  | 1631.47 | 1631.72   | 817.82              | 406520.0  | 1630.86 | 1631.09   | 819.94             | 406634.7  | 1633.21 | 1633.39   |
|          |               | 50               | 819.41                                    | 406432.1  | 1632.27 | 1633.95   | 817.85              | 406691.2  | 1631.24 | 1632.99   | 821.80             | 407189.2  | 1636.18 | 1638.06   |
|          |               | 100              | 823.98                                    | 406826.9  | 1637.63 | 1639.38   | 823.91              | 407351.6  | 1638.61 | 1639.88   | 829.40             | 407566.9  | 1644.54 | 1646.12   |
| MT9      | 300           | 30               | 814.91                                    | 485146.4  | 1623.49 | 1623.92   | 814.20              | 485107.0  | 1622.71 | 1623.25   | 816.78             | 485207.4  | 1625.46 | 1625.81   |
|          |               | 50               | 814.82                                    | 485298.6  | 1623.65 | 1624.61   | 815.46              | 485521.1  | 1624.66 | 1626.56   | 818.12             | 486059.5  | 1628.22 | 1628.94   |
|          |               | 100              | 890.89                                    | 486519.3  | 1701.76 | 1704.95   | 820.64              | 487090.6  | 1632.45 | 1662.91   | 824.55             | 488241.2  | 1638.28 | 1639.96   |
| MT10     | 500           | 30               | 1516.20                                   | 906891.7  | 3027.69 | 3028.09   | 1514.91             | 906824.1  | 3026.28 | 3026.53   | 1517.30            | 907073.6  | 3029.08 | 3029.95   |
|          |               | 50               | 1517.48                                   | 906813.8  | 3028.84 | 3029.62   | 1517.44             | 906775.1  | 3028.73 | 3029.87   | 1519.49            | 907608.6  | 3032.18 | 3033.99   |
|          |               | 100              | 1521.20                                   | 908621.9  | 3035.57 | 3037.12   | 1522.51             | 908946.6  | 3037.42 | 3037.98   | 1528.09            | 910557.0  | 3045.69 | 3046.27   |

Table F. Best and average results using phase two durations of 600 seconds on the new benchmark problems

**A. 6. New Benchmark Problem Data**

**MT1** – Rectangles=100, Sheet=400x600

| Width | Height | Quantity |
|-------|--------|----------|
| 49.5  | 49.5   | 10       |
| 12.5  | 24.1   | 8        |
| 45.9  | 80.1   | 10       |
| 32.8  | 45.2   | 12       |
| 15.7  | 10.2   | 8        |
| 35.2  | 29.777 | 10       |
| 30.5  | 176.8  | 5        |
| 7.5   | 105.8  | 3        |
| 20.5  | 22.8   | 7        |
| 31.4  | 10.8   | 9        |
| 70.4  | 93.4   | 10       |
| 10    | 30     | 8        |

**MT2** – Rectangles=150, Sheet=300x900

| Width | Height | Quantity |
|-------|--------|----------|
| 44.7  | 60     | 15       |
| 31    | 20.3   | 15       |
| 50.6  | 5      | 15       |
| 10    | 20     | 15       |
| 30    | 58.8   | 15       |
| 60.5  | 50     | 15       |
| 44.2  | 85     | 15       |
| 32.3  | 30     | 15       |
| 21    | 50.2   | 15       |
| 30.5  | 29     | 15       |

**MT3** – Rectangles=200, Sheet=400x900

| Width | Height | Quantity |
|-------|--------|----------|
| 42.5  | 65.5   | 10       |
| 90.3  | 80.3   | 9        |
| 52.5  | 24.1   | 16       |
| 45.9  | 80.1   | 10       |
| 32.8  | 15.2   | 15       |
| 15.7  | 10.2   | 8        |
| 31.2  | 9.777  | 10       |
| 60.5  | 36.8   | 7        |
| 70.5  | 55.8   | 12       |
| 20.5  | 22.8   | 7        |
| 11.4  | 40.8   | 15       |
| 50.4  | 56.4   | 10       |
| 14    | 28     | 8        |
| 30.3  | 125.1  | 2        |
| 8.3   | 12.4   | 14       |
| 14.1  | 20.1   | 4        |
| 5.9   | 6.1    | 12       |
| 130.4 | 114.8  | 1        |
| 13.2  | 8.1    | 7        |
| 3.4   | 20.3   | 6        |
| 40.3  | 10.2   | 5        |
| 40.2  | 30.6   | 5        |
| 34.8  | 22.5   | 7        |

**MT4** – Rectangles=300, Sheet=600x1300

| Width | Height | Quantity |
|-------|--------|----------|
| 20    | 70     | 5        |
| 43    | 71     | 10       |
| 80    | 20     | 8        |
| 25    | 26     | 20       |
| 101   | 76     | 5        |
| 30    | 13     | 19       |
| 170   | 20     | 9        |
| 10    | 15     | 20       |
| 37    | 13     | 15       |
| 99    | 55     | 12       |
| 111   | 52     | 4        |
| 40    | 50     | 10       |
| 50    | 60     | 10       |
| 10    | 15     | 20       |
| 95    | 37     | 17       |
| 67    | 87     | 24       |
| 43    | 82     | 10       |
| 34    | 57     | 20       |
| 10    | 169    | 5        |
| 15    | 90     | 2        |
| 18    | 18     | 5        |
| 20    | 15     | 10       |
| 32    | 39     | 20       |
| 62    | 80     | 20       |

MT5 – Rectangles=500, Sheet=800x1400

MT6 – Rectangles=100, Sheet=400x500

| Width | Height | Quantity |
|-------|--------|----------|
| 20    | 70     | 5        |
| 43    | 71     | 10       |
| 80    | 20     | 8        |
| 25    | 26     | 20       |
| 101   | 76     | 5        |
| 30    | 13     | 19       |
| 170   | 20     | 9        |
| 10    | 15     | 20       |
| 37    | 13     | 15       |
| 99    | 55     | 12       |
| 111   | 52     | 4        |
| 40    | 50     | 10       |
| 50    | 60     | 10       |
| 10    | 15     | 20       |
| 95    | 37     | 17       |
| 67    | 87     | 24       |
| 43    | 82     | 10       |
| 34    | 57     | 20       |
| 10    | 169    | 5        |
| 15    | 90     | 2        |
| 18    | 18     | 5        |
| 20    | 15     | 10       |
| 32    | 39     | 20       |
| 62    | 80     | 20       |

| Width   | Height  | Width  | Height | Width  | Height |
|---------|---------|--------|--------|--------|--------|
| 27.512  | 234.999 | 39.306 | 31.992 | 39.306 | 40.183 |
| 199.36  | 33.779  | 31.982 | 39.161 | 35.069 | 44.195 |
| 196.456 | 35.04   | 39.306 | 31.492 | 42.063 | 37.106 |
| 180.646 | 41.972  | 44.37  | 26.295 | 33.478 | 45.057 |
| 177.68  | 42.868  | 28.545 | 41.972 | 35.625 | 41.972 |
| 170.417 | 37.106  | 44.37  | 25.494 | 33.478 | 43.542 |
| 33.478  | 172.228 | 35.51  | 33.779 | 34.089 | 42.868 |
| 39.306  | 159.304 | 26.956 | 41.972 | 33.478 | 42.717 |
| 31.982  | 157.449 | 44.531 | 23.544 | 32.177 | 42.868 |
| 106.471 | 81.204  | 42.603 | 25.451 | 41.07  | 33.575 |
| 25.378  | 160.305 | 33.328 | 33.779 | 44.37  | 29.863 |
| 158.302 | 19.435  | 33.153 | 33.779 | 31.819 | 41.972 |
| 41.07   | 135.208 | 39.306 | 27.559 | 39.306 | 33.717 |
| 139.246 | 33.795  | 42.496 | 23.544 | 39.306 | 33.59  |
| 137.903 | 25.451  | 22.971 | 42.868 | 44.37  | 27.992 |
| 115.684 | 44.195  | 42.209 | 23.544 | 38.418 | 33.779 |
| 32.775  | 126.51  | 21.769 | 42.868 | 33.478 | 37.925 |
| 44.37   | 109.042 | 19.971 | 44.195 | 44.37  | 27.017 |
| 106.471 | 45.306  | 41.07  | 22.685 | 37.644 | 19.435 |
| 111.667 | 36.305  | 38.817 | 23.544 | 37.579 | 19.435 |
| 17.658  | 125.495 | 36.809 | 25.451 | 34.182 | 19.435 |
| 104.507 | 23.544  | 38.595 | 23.544 | 29.92  | 23.544 |
| 47.236  | 41.972  | 24.477 | 37.106 | 17.808 | 35.04  |
| 44.44   | 44.195  | 24.354 | 37.106 | 17.658 | 34.81  |
| 40.17   | 44.195  | 26.753 | 33.779 | 26.195 | 25.451 |
| 47.525  | 36.305  | 23.07  | 37.106 | 33.478 | 18.102 |
| 44.37   | 38.539  | 16.851 | 42.868 | 27.512 | 23.895 |
| 39.421  | 42.868  | 23.09  | 36.305 | 33.478 | 16.433 |
| 38.791  | 42.868  | 16.251 | 42.868 | 23.756 | 25.451 |
| 41.07   | 40.182  | 17.063 | 41.972 | 33.478 | 15.612 |
| 44.37   | 36.489  | 16.514 | 41.972 | 22.697 | 23.544 |
| 42.835  | 37.106  | 15.596 | 41.972 | 27.512 | 16.951 |
| 18.669  | 23.544  | 15.58  | 25.451 |        |        |
| 17.559  | 23.544  | 15.139 | 19.435 |        |        |

MT7 – Rectangles=150, Sheet=400x500

| Width   | Height  | Width  | Height | Width  | Height | Width  | Height | Width  | Height | Width  | Height |
|---------|---------|--------|--------|--------|--------|--------|--------|--------|--------|--------|--------|
| 202.076 | 33.656  | 37.913 | 12.586 | 27.544 | 35.951 | 16.711 | 33.656 | 7.302  | 25.987 | 14.725 | 21.891 |
| 17.307  | 199.243 | 37.913 | 24.104 | 17.425 | 35.951 | 19.55  | 33.656 | 25.208 | 25.987 | 8.172  | 21.891 |
| 26.547  | 197.95  | 37.913 | 30.366 | 13.814 | 35.951 | 16.388 | 33.656 | 25.922 | 21.339 | 10.01  | 21.891 |
| 197.837 | 21.891  | 37.913 | 35.627 | 30.359 | 35.951 | 33.566 | 21.891 | 25.754 | 10.646 | 16.5   | 21.891 |
| 193.599 | 21.756  | 37.913 | 12.889 | 31.091 | 35.951 | 32.804 | 25.578 | 24.034 | 25.578 | 17.517 | 21.891 |
| 16.023  | 193.293 | 37.913 | 17.879 | 33.608 | 35.951 | 32.592 | 19.854 | 14.79  | 25.578 | 11.937 | 21.756 |
| 190.63  | 28.737  | 37.913 | 12.162 | 14.279 | 35.951 | 32.508 | 25.987 | 19.477 | 25.578 | 20.915 | 21.756 |
| 190.63  | 177.112 | 37.913 | 18.428 | 35.444 | 35.951 | 8.393  | 31.436 | 6.61   | 25.578 | 14.659 | 21.756 |
| 23.793  | 187.358 | 37.913 | 27.532 | 35.851 | 31.436 | 18.788 | 31.436 | 18.738 | 25.578 | 6.919  | 21.339 |
| 186.312 | 25.177  | 37.908 | 10.646 | 35.427 | 10.266 | 6.096  | 31.436 | 19.083 | 25.177 | 17.307 | 21.275 |
| 185.174 | 19.854  | 37.473 | 19.854 | 34.974 | 21.339 | 15.889 | 31.436 | 23.094 | 25.177 | 20.212 | 10.646 |
| 184.718 | 10.614  | 37.154 | 11.027 | 34.839 | 25.578 | 31.162 | 25.987 | 21.316 | 25.177 | 8.307  | 19.854 |
| 34.457  | 184.483 | 37.154 | 28.582 | 23.793 | 34.602 | 30.954 | 21.339 | 20.426 | 25.177 | 12.866 | 19.854 |
| 183.673 | 25.987  | 37.154 | 11.165 | 34.457 | 24.599 | 30.29  | 25.578 | 21.269 | 25.177 | 18.025 | 19.854 |
| 181.449 | 25.578  | 37.154 | 22.976 | 34.457 | 17.647 | 17.307 | 27.967 | 24.503 | 10.646 | 8.683  | 19.854 |
| 16.176  | 180.713 | 37.154 | 6.785  | 16.176 | 34.04  | 27.336 | 25.987 | 24.228 | 19.854 | 11.245 | 19.854 |
| 178.305 | 10.646  | 37.154 | 6.75   | 33.905 | 25.177 | 26.547 | 26.855 | 23.793 | 22.539 | 16.176 | 18.205 |
| 37.913  | 177.419 | 37.154 | 11.989 | 22.309 | 33.656 | 26.547 | 6.365  | 23.793 | 14.862 | 16.588 | 10.646 |
| 176.29  | 35.951  | 37.154 | 10.495 | 6.897  | 33.656 | 26.547 | 17.964 | 23.793 | 10.598 | 16.176 | 9.681  |
| 174.217 | 21.339  | 36.969 | 25.578 | 21.813 | 33.656 | 26.547 | 14.298 | 23.793 | 17.671 | 16.176 | 10.348 |
| 173.4   | 31.436  | 16.176 | 36.758 | 14.269 | 33.656 | 26.547 | 18.662 | 23.793 | 13.63  | 16.023 | 12.556 |
| 171.226 | 10.266  | 36.555 | 25.177 | 8.266  | 33.656 | 26.547 | 23.889 | 23.494 | 19.854 | 13.898 | 10.646 |
| 37.154  | 170.152 | 16.176 | 36.494 | 31.774 | 33.656 | 26.547 | 17.168 | 16.176 | 22.899 | 13.719 | 10.614 |
| 38.572  | 10.646  | 36.316 | 10.646 | 18.591 | 33.656 | 15.029 | 25.987 | 22.585 | 21.339 | 7.944  | 10.646 |
| 38.04   | 25.177  | 20.146 | 35.951 | 21.356 | 33.656 | 23.693 | 25.987 | 21.037 | 21.891 | 8.216  | 10.614 |

MT8 – Rectangles=200, Sheet=500x800

| Width   | Height  | Width  | Height | Width  | Height | Width  | Height |
|---------|---------|--------|--------|--------|--------|--------|--------|
| 345.889 | 367.32  | 40.963 | 32.484 | 43.229 | 19.342 | 21.938 | 32.151 |
| 29.314  | 367.32  | 40.344 | 33.069 | 21.033 | 41.48  | 23.624 | 30.393 |
| 38.752  | 332.136 | 35.817 | 36.728 | 25.437 | 36.728 | 20.869 | 33.069 |
| 325.393 | 31.617  | 40.787 | 30.393 | 26.039 | 35.984 | 20.786 | 33.069 |
| 45.082  | 278.932 | 40.963 | 29.819 | 31.417 | 30.393 | 20.614 | 33.069 |
| 288.682 | 30.713  | 26.548 | 43.956 | 29.523 | 32.151 | 20.55  | 33.069 |
| 40.963  | 154.009 | 40.963 | 29.31  | 34.781 | 26.83  | 23.088 | 30.393 |
| 103.746 | 41.48   | 41.476 | 28.511 | 24.862 | 36.728 | 21.11  | 32.151 |
| 115.92  | 28.511  | 50.594 | 19.342 | 19.53  | 41.906 | 24.613 | 28.511 |
| 98.582  | 43.956  | 45.082 | 24.833 | 34.489 | 26.83  | 29.589 | 23.522 |
| 82.801  | 41.906  | 36.479 | 33.069 | 39.076 | 22.217 | 26.218 | 26.83  |
| 87.041  | 35.984  | 40.647 | 28.511 | 34.268 | 26.83  | 19.955 | 33.069 |
| 88.961  | 32.151  | 40.963 | 28.037 | 28.451 | 32.151 | 33.554 | 19.342 |
| 51.745  | 43.956  | 32.112 | 36.728 | 24.524 | 35.984 | 24.382 | 28.511 |
| 45.082  | 47.894  | 36.4   | 32.151 | 23.6   | 36.728 | 22.156 | 30.393 |
| 62.51   | 30.393  | 36.29  | 32.151 | 31.706 | 28.511 | 19.32  | 33.069 |
| 50.979  | 41.906  | 26.627 | 41.48  | 40.963 | 19.159 | 19.286 | 33.069 |
| 45.082  | 47.278  | 37.457 | 30.393 | 29.421 | 30.393 | 19.159 | 33.069 |
| 47.76   | 43.956  | 30.935 | 36.728 | 27.005 | 32.151 | 20.051 | 32.151 |
| 50.141  | 41.48   | 30.817 | 36.728 | 38.752 | 20.333 | 32.842 | 19.342 |
| 49.463  | 41.906  | 23.537 | 43.956 | 22.321 | 36.728 | 21.79  | 30.393 |
| 40.963  | 48.607  | 38.752 | 28.737 | 26.833 | 32.151 | 19.029 | 33.069 |
| 46.989  | 41.48   | 25.273 | 41.906 | 25.853 | 33.069 | 21.557 | 30.393 |
| 46.907  | 41.48   | 36.775 | 30.393 | 22.895 | 35.984 | 19.53  | 32.151 |
| 45.518  | 41.48   | 25.32  | 41.48  | 39.076 | 19.689 | 23.048 | 28.511 |
| 49.747  | 36.728  | 25.237 | 41.48  | 38.752 | 19.981 | 24.68  | 26.83  |
| 50.219  | 35.984  | 24.704 | 41.906 | 21.862 | 36.728 | 31.603 | 19.505 |
| 49.466  | 36.728  | 24.703 | 41.906 | 28.126 | 30.393 | 19.693 | 31.155 |
| 44.015  | 41.906  | 35.297 | 30.713 | 39.173 | 19.342 | 31.372 | 19.156 |
| 40.963  | 44.058  | 22.007 | 43.956 | 22.268 | 35.984 | 19.059 | 31.155 |
| 40.963  | 43.085  | 29.946 | 35.984 | 27.735 | 30.393 | 29.589 | 20.434 |
| 40.963  | 42.93   | 38.905 | 26.83  | 30.726 | 26.83  | 23.183 | 26.83  |
| 39.195  | 43.956  | 21.521 | 43.956 | 21.486 | 35.984 | 20.564 | 28.511 |
| 41.135  | 41.906  | 28.727 | 36.728 | 38.011 | 19.342 | 19.628 | 28.511 |
| 49.859  | 33.069  | 23.007 | 41.906 | 30.218 | 26.83  | 25.296 | 22.832 |
| 46.517  | 35.984  | 37.916 | 26.83  | 24.738 | 32.151 | 20.232 | 26.83  |
| 49.81   | 31.617  | 32.484 | 32.151 | 26.427 | 30.393 | 25.854 | 20.976 |
| 44.709  | 35.984  | 38.752 | 25.819 | 24.578 | 32.151 | 19.843 | 26.83  |
| 44.454  | 35.984  | 33.988 | 30.393 | 37.267 | 19.342 | 27.318 | 19.342 |
| 46.633  | 33.069  | 31.213 | 33.069 | 19.617 | 36.728 | 19.723 | 26.83  |
| 48.971  | 30.713  | 22.101 | 41.906 | 19.359 | 36.728 | 25.296 | 21.124 |
| 46.303  | 33.069  | 22.468 | 41.48  | 27.571 | 28.511 | 25.854 | 20.504 |
| 37.767  | 41.48   | 22.393 | 41.48  | 31.603 | 24.451 | 19.313 | 26.83  |
| 50.73   | 28.511  | 21.841 | 41.906 | 19.863 | 35.984 | 26.439 | 19.342 |
| 47.335  | 30.713  | 40.963 | 22.647 | 19.027 | 36.728 | 24.285 | 19.342 |
| 33.585  | 43.956  | 33.142 | 30.393 | 28.835 | 26.83  | 24.113 | 19.342 |
| 43.748  | 33.069  | 19.403 | 43.956 | 36.317 | 19.342 | 23.059 | 19.342 |
| 39.969  | 36.728  | 31.065 | 32.151 | 19.076 | 35.984 | 23.031 | 19.342 |
| 49.41   | 26.83   | 31.043 | 32.151 | 31.372 | 22.75  | 21.668 | 19.342 |
| 29.629  | 43.956  | 26.325 | 36.728 | 27.26  | 26.83  | 19.1   | 19.342 |

MT9 – Rectangles=300, Sheet=600x800

| Width   | Height  |
|---------|---------|---------|---------|---------|---------|---------|---------|---------|---------|---------|---------|
| 19.532  | 36.64   | 32.646  | 40.085  | 21.805  | 40.085  | 37.77   | 15.477  | 17.811  | 19.724  | 15.883  | 21.714  |
| 31.32   | 31.678  | 15.769  | 8.611   | 37.77   | 14.441  | 17.627  | 32.348  | 35.505  | 28.834  | 31.531  | 15.098  |
| 37.77   | 318.604 | 297.215 | 38.57   | 31.32   | 28.832  | 13.251  | 39.678  | 35.437  | 17.443  | 134.869 | 199.671 |
| 19.532  | 36.704  | 31.851  | 18.53   | 39.982  | 38.57   | 38.608  | 40.085  | 21.786  | 33.574  | 28.049  | 31.194  |
| 31.32   | 323.323 | 296.857 | 19.201  | 27.682  | 32.156  | 31.851  | 20.963  | 33.358  | 15.115  | 28.049  | 12.482  |
| 20.043  | 32.725  | 31.851  | 14.541  | 19.54   | 40.085  | 15.238  | 10.084  | 33.679  | 32.725  | 17.811  | 29.487  |
| 320.724 | 25.985  | 27.682  | 12.495  | 31.531  | 27.984  | 31.851  | 36.29   | 25.455  | 328.907 | 17.317  | 32.185  |
| 312.159 | 33.574  | 38.574  | 31.4    | 20.894  | 38.57   | 31.851  | 20.665  | 27.682  | 347.555 | 18.743  | 17.443  |
| 37.77   | 24.023  | 25.455  | 8.721   | 28.049  | 9.243   | 37.77   | 22.987  | 27.659  | 17.443  | 37.185  | 28.834  |
| 17.627  | 26.323  | 31.32   | 38.204  | 19.532  | 324.538 | 17.627  | 32.353  | 252.745 | 31.668  | 20.42   | 15.115  |
| 334.163 | 9.373   | 15.238  | 27.424  | 37.77   | 16.174  | 307.25  | 8.498   | 28.638  | 40.085  | 16.29   | 19.201  |
| 17.627  | 323.76  | 33.86   | 15.115  | 31.749  | 27.329  | 11.869  | 40.085  | 25.455  | 19.276  | 26.695  | 8.498   |
| 37.77   | 15.832  | 31.851  | 35.765  | 37.77   | 22.867  | 30.159  | 25.985  | 27.682  | 22.034  | 28.049  | 28.852  |
| 320.796 | 15.115  | 31.32   | 21.439  | 31.531  | 40.333  | 13.16   | 38.57   | 31.531  | 12.824  | 25.455  | 9.332   |
| 19.532  | 32.309  | 31.531  | 17.958  | 248.426 | 31.4    | 17.627  | 10.008  | 30.042  | 15.115  | 31.531  | 33.621  |
| 22.331  | 15.115  | 19.532  | 15.567  | 25.455  | 33.022  | 25.455  | 25.97   | 31.531  | 36.641  | 28.049  | 30.586  |
| 8.636   | 25.985  | 31.531  | 35.371  | 31.531  | 17.44   | 8.371   | 38.57   | 31.851  | 11.295  | 25.455  | 8.998   |
| 35.074  | 40.085  | 15.883  | 39.931  | 37.77   | 20.129  | 17.811  | 33.048  | 31.851  | 11.087  | 31.851  | 37.69   |
| 28.049  | 35.227  | 31.851  | 40.596  | 27.682  | 12.29   | 8.091   | 35.113  | 9.741   | 12.281  | 15.883  | 18.071  |
| 28.049  | 22.245  | 31.851  | 34.789  | 20.381  | 37.01   | 28.049  | 14.467  | 25.455  | 8.115   | 13.251  | 17.534  |
| 30.788  | 38.57   | 19.532  | 39.174  | 37.77   | 35.893  | 11.916  | 9.755   | 28.049  | 14.309  | 15.784  | 15.115  |
| 9.536   | 11.55   | 31.851  | 12.732  | 33.694  | 26.512  | 25.455  | 22.867  | 28.049  | 14.264  | 31.32   | 13.91   |
| 31.531  | 40.021  | 17.811  | 12.621  | 13.151  | 25.985  | 15.091  | 34.899  | 22.9    | 210.408 | 15.238  | 16.725  |
| 31.846  | 33.885  | 27.682  | 8.408   | 25.455  | 31.342  | 37.77   | 23.087  | 13.251  | 301.511 | 28.049  | 18.538  |
| 13.251  | 25.887  | 34.255  | 31.668  | 18.215  | 38.57   | 19.532  | 33.523  | 15.883  | 25.441  | 26.027  | 40.085  |
| 31.846  | 281.883 | 10.69   | 19.201  | 37.77   | 37.147  | 23.926  | 25.985  | 27.682  | 13.505  | 31.32   | 9.3     |
| 31.851  | 279.375 | 27.682  | 37.948  | 19.532  | 36.856  | 37.77   | 13.089  | 17.627  | 33.091  | 15.238  | 14.37   |
| 15.883  | 293.938 | 37.77   | 27.606  | 37.77   | 18.569  | 31.531  | 13.948  | 37.77   | 14.363  | 19.532  | 18.287  |
| 25.455  | 21.132  | 300.699 | 32.185  | 31.32   | 24.966  | 316.172 | 40.085  | 35.434  | 27.329  | 31.32   | 21.119  |
| 259.938 | 32.725  | 31.851  | 38.22   | 34.108  | 25.985  | 37.77   | 11.585  | 23.134  | 15.115  | 16.87   | 32.185  |
| 288.937 | 28.834  | 24.627  | 32.185  | 31.851  | 27.296  | 11.916  | 37.37   | 17.627  | 22.288  | 15.883  | 22.529  |
| 17.627  | 27.392  | 31.851  | 16.82   | 19.173  | 9.528   | 13.86   | 15.317  | 28.049  | 32.77   | 11.415  | 17.081  |
| 8.506   | 25.985  | 37.77   | 8.75    | 36.98   | 199.671 | 31.531  | 29.923  | 31.274  | 8.745   | 17.627  | 10.804  |
| 258.097 | 12.294  | 11.916  | 325.991 | 271.909 | 34.899  | 17.627  | 40.701  | 31.274  | 8.698   | 28.049  | 9.866   |
| 29.809  | 25.985  | 15.238  | 357.933 | 31.851  | 23.689  | 27.682  | 21.091  | 37.77   | 16.051  | 17.627  | 10.388  |
| 248.356 | 12.281  | 31.32   | 19.811  | 15.238  | 40.184  | 15.238  | 13.646  | 13.484  | 15.115  | 18.525  | 9.373   |
| 222.857 | 34.471  | 31.32   | 30.86   | 12.606  | 15.115  | 17.627  | 28.436  | 31.32   | 8.41    | 31.32   | 22.526  |
| 28.108  | 210.408 | 30.188  | 30.369  | 13.251  | 13.51   | 31.531  | 287.962 | 15.238  | 24.277  | 37.77   | 13.87   |
| 37.77   | 29.076  | 15.919  | 11.55   | 19.958  | 35.113  | 31.32   | 16.564  | 16.987  | 24.575  | 17.811  | 326.744 |
| 39.164  | 27.329  | 25.455  | 36.184  | 15.238  | 39.407  | 21.877  | 25.985  | 24.075  | 32.725  | 11.595  | 15.317  |
| 27.867  | 25.985  | 19.532  | 25.441  | 31.851  | 40.276  | 8.939   | 9.373   | 28.049  | 11.084  | 31.531  | 14.533  |
| 192.669 | 12.36   | 174.264 | 27.329  | 19.532  | 27.97   | 15.238  | 32.54   | 23.324  | 15.115  | 28.049  | 8.629   |
| 31.851  | 26.83   | 33.767  | 27.329  | 28.049  | 12.846  | 37.77   | 9.952   | 19.532  | 19.454  | 34.099  | 32.725  |
| 20.381  | 311.531 | 31.851  | 29.041  | 31.851  | 8.395   | 31.32   | 16.298  | 31.531  | 39.145  | 13.251  | 9.136   |
| 13.251  | 40.599  | 14.04   | 17.081  | 22.658  | 32.725  | 31.32   | 27.788  | 19.05   | 19.201  | 13.091  | 15.115  |
| 13.251  | 23.228  | 31.32   | 33.718  | 28.049  | 25.785  | 15.238  | 21.302  | 28.049  | 12.362  | 31.32   | 30.069  |
| 171.849 | 10.737  | 254.703 | 32.773  | 18.858  | 38.57   | 37.77   | 16.387  | 18.74   | 19.201  | 222.857 | 40.52   |
| 36.567  | 38.57   | 25.455  | 35.267  | 312.91  | 17.443  | 19.567  | 27.329  | 28.049  | 290.855 | 8.876   | 9.528   |
| 33.694  | 22.947  | 27.682  | 33.002  | 15.009  | 38.57   | 192.669 | 18.009  | 25.455  | 16.212  | 25.455  | 22.341  |
| 34.979  | 32.185  | 37.77   | 26.947  | 19.532  | 33.782  | 37.77   | 27.094  | 11.616  | 25.985  | 9.686   | 8.611   |

MT10 – Rectangles=500, Sheet=700x800

| Width   | Height  | Width   | Height  | Width   | Height | Width   | Height  | Width   | Height | Width   | Height  | Width   | Height  | Width   | Height  |
|---------|---------|---------|---------|---------|--------|---------|---------|---------|--------|---------|---------|---------|---------|---------|---------|
| 19.499  | 19.803  | 45.522  | 43.102  | 44.592  | 19.211 | 41.627  | 28.916  | 17.156  | 48.523 | 19.813  | 35.089  | 22.675  | 35.089  | 29.44   | 17.364  |
| 24.349  | 369.233 | 40.017  | 42.207  | 32.06   | 28.129 | 40.017  | 30.497  | 20.341  | 45.337 | 32.784  | 37.653  | 25.267  | 36.77   | 27.398  | 19.346  |
| 40.193  | 38.178  | 46.281  | 42.141  | 43.241  | 34.171 | 24.367  | 28.129  | 40.017  | 35.95  | 68.631  | 191.739 | 31.125  | 23.263  | 27.007  | 19.552  |
| 34.878  | 314.222 | 40.017  | 16.742  | 29.44   | 47.905 | 31.125  | 271.041 | 21.483  | 44.033 | 47.729  | 25.521  | 34.878  | 18.066  | 26.163  | 20.351  |
| 40.017  | 16.016  | 17.267  | 42.141  | 40.017  | 37.304 | 40.017  | 38.606  | 26.697  | 38.729 | 25.267  | 26.923  | 35.815  | 18.389  | 24.501  | 21.711  |
| 144.76  | 44.427  | 41.694  | 25.318  | 34.878  | 42.189 | 144.76  | 27.943  | 23.044  | 42.141 | 40.55   | 18.389  | 31.125  | 21.373  | 25.85   | 20.351  |
| 29.292  | 176.546 | 40.017  | 47.512  | 29.973  | 47.059 | 39.097  | 36.981  | 17.935  | 47.245 | 22.372  | 37.426  | 34.878  | 21.623  | 47.134  | 22.943  |
| 298.58  | 25.521  | 44.592  | 42.746  | 40.017  | 21.77  | 28.021  | 42.141  | 21.98   | 43.102 | 29.255  | 40.856  | 25.878  | 27.652  | 42.413  | 20.298  |
| 285.122 | 37.426  | 43.986  | 43.327  | 32.88   | 43.327 | 25.878  | 40.967  | 31.125  | 33.88  | 32.836  | 26.803  | 34.878  | 19.977  | 250.273 | 20.351  |
| 47.134  | 269.997 | 29.44   | 25.1    | 45.373  | 43.102 | 126.825 | 47.245  | 273.429 | 34.171 | 44.592  | 18.385  | 34.878  | 18.311  | 20.161  | 25.583  |
| 270.36  | 39.989  | 48.034  | 38.729  | 22.308  | 38.306 | 20.309  | 33.029  | 22.723  | 34.171 | 40.017  | 19.32   | 34.878  | 18.102  | 22.146  | 19.346  |
| 25.878  | 38.901  | 29.44   | 45.649  | 44.592  | 31.399 | 42.488  | 19.979  | 25.878  | 27.897 | 26.181  | 33.029  | 244.818 | 43.996  | 276.139 | 28.916  |
| 42.488  | 22.494  | 29.44   | 46.162  | 20.341  | 45.321 | 42.488  | 27.202  | 34.878  | 24.905 | 25.878  | 33.323  | 42.4    | 34.171  | 42.488  | 19.232  |
| 44.592  | 28.418  | 36.62   | 38.548  | 29.44   | 46.424 | 40.017  | 44.475  | 42.413  | 30.264 | 19.187  | 39.989  | 19.828  | 33.029  | 40.017  | 30.275  |
| 38.913  | 38.729  | 30.169  | 18.664  | 42.488  | 33.346 | 20.341  | 32.264  | 20.448  | 25.521 | 25.878  | 33.228  | 16.118  | 20.351  | 23.388  | 43.102  |
| 19.203  | 46.777  | 44.592  | 19.219  | 45.482  | 41.13  | 31.125  | 37.911  | 68.631  | 28.516 | 19.147  | 25.521  | 40.017  | 44.542  | 20.341  | 24.803  |
| 22.873  | 27.258  | 42.488  | 42.806  | 42.488  | 27.456 | 20.341  | 41.708  | 144.76  | 27.084 | 41.694  | 38.734  | 29.44   | 20.122  | 25.641  | 19.42   |
| 20.341  | 282.291 | 144.76  | 18.681  | 26.316  | 41.13  | 37.956  | 28.916  | 24.309  | 42.141 | 48.278  | 25.189  | 18.767  | 38.729  | 20.341  | 24.701  |
| 38.477  | 20.351  | 37.166  | 19.346  | 42.488  | 30.716 | 25.878  | 43.002  | 20.341  | 47.991 | 31.125  | 27.743  | 19.248  | 43.102  | 24.656  | 20.351  |
| 272.463 | 28.129  | 46.238  | 38.729  | 31.748  | 44.033 | 42.488  | 25.954  | 44.081  | 19.346 | 29.973  | 44.369  | 31.125  | 21.287  | 19.978  | 22.655  |
| 23.781  | 20.351  | 40.017  | 44.788  | 25.878  | 46.776 | 26.065  | 28.916  | 41.694  | 21.723 | 44.592  | 43.125  | 19.303  | 33.029  | 36.043  | 44.465  |
| 23.249  | 34.171  | 42.413  | 42.381  | 20.653  | 34.171 | 44.592  | 23.772  | 34.878  | 47.284 | 16.194  | 19.346  | 31.125  | 42.709  | 42.488  | 30.522  |
| 25.878  | 270.435 | 28.143  | 20.351  | 43.277  | 43.102 | 20.341  | 25.479  | 47.22   | 38.178 | 37.826  | 41.13   | 29.44   | 22.669  | 21.716  | 22.655  |
| 275.81  | 18.389  | 26.973  | 25.583  | 42.488  | 44.159 | 31.125  | 47.517  | 20.341  | 42.549 | 41.694  | 16.852  | 25.878  | 25.803  | 260.276 | 38.548  |
| 268.605 | 25.189  | 22.937  | 33.029  | 29.44   | 45.556 | 25.878  | 42.442  | 25.878  | 36.933 | 20.18   | 38.306  | 23.436  | 24.831  | 29.44   | 38.125  |
| 259.574 | 30.463  | 41.694  | 40.813  | 16.846  | 43.102 | 29.44   | 38.808  | 32.888  | 25.189 | 44.592  | 35.285  | 29.44   | 21.891  | 41.358  | 34.171  |
| 20.341  | 25.114  | 40.017  | 44.171  | 44.592  | 24.918 | 38.258  | 28.916  | 40.954  | 44.033 | 230.319 | 40.856  | 32.919  | 18.389  | 20.341  | 22.522  |
| 41.694  | 29.302  | 41.694  | 42.464  | 31.125  | 43.629 | 23.653  | 44.465  | 20.341  | 42.217 | 25.878  | 28.738  | 25.878  | 17.898  | 22.989  | 19.803  |
| 29.973  | 26.921  | 44.731  | 34.171  | 31.993  | 38.178 | 42.488  | 46.492  | 17.744  | 21.901 | 40.017  | 17.637  | 20.341  | 30.602  | 40.017  | 35.661  |
| 261.119 | 26.803  | 41.694  | 42.325  | 44.592  | 46.079 | 246.811 | 36.189  | 42.488  | 33.285 | 34.878  | 22.743  | 34.878  | 47.461  | 42.249  | 38.627  |
| 249.873 | 36.981  | 34.878  | 37.716  | 40.017  | 34.519 | 29.44   | 38.405  | 25.878  | 36.511 | 29.44   | 20.885  | 28.763  | 33.029  | 20.341  | 21.629  |
| 40.017  | 21.673  | 39.458  | 43.327  | 41.37   | 33.029 | 31.125  | 36.448  | 42.689  | 41.13  | 18.139  | 369.233 | 30.169  | 20.065  | 16.608  | 25.189  |
| 40.017  | 34.527  | 44.592  | 38.143  | 42.488  | 37.944 | 163.562 | 44.037  | 19.127  | 43.102 | 27.007  | 23.55   | 34.878  | 33.299  | 25.878  | 19.843  |
| 235.971 | 44.465  | 44.592  | 39.887  | 31.125  | 43.183 | 29.44   | 48.055  | 29.039  | 42.141 | 25.878  | 31.568  | 16.851  | 21.977  | 22.056  | 19.359  |
| 40.017  | 239.954 | 34.878  | 47.481  | 25.267  | 29.866 | 20.341  | 19.844  | 42.413  | 288.09 | 259.574 | 38.552  | 43.267  | 27.683  | 16.581  | 24.831  |
| 240.328 | 38.627  | 41.694  | 19.648  | 40.017  | 34.058 | 29.973  | 275.225 | 29.44   | 46.254 | 31.822  | 25.521  | 34.878  | 23.713  | 20.341  | 21.055  |
| 231.695 | 44.033  | 41.694  | 261.502 | 25.878  | 19.732 | 48.65   | 20.351  | 34.878  | 34.152 | 25.878  | 29.601  | 20.341  | 29.62   | 20.526  | 20.351  |
| 255.094 | 19.346  | 40.017  | 45.681  | 17.679  | 44.465 | 29.44   | 32.34   | 45.921  | 41.13  | 20.341  | 25.323  | 30.56   | 19.169  | 42.488  | 33.56   |
| 245.939 | 27.683  | 42.413  | 39.698  | 41.694  | 31.723 | 18.759  | 34.171  | 31.125  | 30.771 | 20.341  | 30.928  | 20.168  | 19.346  | 47.134  | 21.19   |
| 293.955 | 16.299  | 17.158  | 43.102  | 16.708  | 19.346 | 47.134  | 40.777  | 47.742  | 18.389 | 25.878  | 40.338  | 30.232  | 19.346  | 20.341  | 19.553  |
| 28.9    | 28.916  | 20.341  | 18.624  | 23.285  | 46.777 | 31.125  | 33.135  | 31.125  | 26.486 | 29.973  | 26.856  | 29.44   | 24.412  | 25.267  | 36.846  |
| 16.463  | 44.465  | 34.878  | 29.042  | 22.895  | 37.653 | 39.056  | 27.683  | 34.104  | 27.683 | 47.134  | 41.195  | 30.081  | 19.169  | 17.987  | 21.711  |
| 46.837  | 220.255 | 233.868 | 37.653  | 30.973  | 42.141 | 20.341  | 25.036  | 34.878  | 39.891 | 44.592  | 37.079  | 20.341  | 28.523  | 20.48   | 19.169  |
| 21.243  | 28.916  | 41.797  | 17.207  | 41.694  | 25.346 | 40.017  | 19.146  | 20.341  | 46.653 | 40.017  | 30.461  | 29.973  | 36.975  | 239.714 | 42.141  |
| 244.774 | 43.327  | 39.655  | 19.346  | 20.341  | 24.302 | 40.017  | 17.576  | 21.926  | 38.627 | 27.529  | 28.916  | 29.973  | 38.074  | 33.476  | 28.129  |
| 191.937 | 38.729  | 46.132  | 20.351  | 34.878  | 31.121 | 29.44   | 33.104  | 32.826  | 28.916 | 29.44   | 26.708  | 17.722  | 48.523  | 29.44   | 17.774  |
| 208.479 | 19.169  | 34.878  | 45.117  | 42.488  | 30.476 | 23.03   | 43.327  | 42.488  | 41.619 | 44.592  | 301.283 | 20.341  | 28.25   | 29.44   | 423.136 |
| 41.694  | 23.196  | 42.413  | 21.551  | 29.44   | 43.473 | 29.44   | 43.473  | 29.44   | 19.314 | 31.125  | 30.685  | 32.081  | 38.729  | 34.878  | 26.048  |
| 27.86   | 44.465  | 42.488  | 37.355  | 34.345  | 38.548 | 29.44   | 36.799  | 21.722  | 33.083 | 17.255  | 38.627  | 20.341  | 28.078  | 19.638  | 19.359  |
| 40.017  | 45.274  | 40.017  | 44.726  | 31.125  | 33.016 | 18.295  | 33.083  | 29.973  | 44.214 | 36.661  | 19.169  | 21.791  | 20.351  | 44.592  | 18.033  |
| 144.76  | 36.05   | 40.608  | 38.627  | 33.096  | 25.521 | 40.017  | 33.215  | 23.747  | 37.426 | 29.44   | 26.159  | 22.872  | 25.521  | 21.696  | 25.521  |
| 17.134  | 21.901  | 40.017  | 17.028  | 29.92   | 43.709 | 208.724 | 41.13   | 44.592  | 16.574 | 29.973  | 35.9    | 25.878  | 22.459  | 40.017  | 34.905  |
| 25.267  | 34.91   | 16.131  | 19.042  | 28.332  | 44.037 | 22.83   | 43.327  | 20.341  | 27.491 | 29.44   | 26.033  | 46.883  | 19.346  | 21.061  | 16.725  |
| 25.878  | 36.34   | 20.341  | 22.881  | 291.007 | 38.178 | 34.878  | 31.278  | 20.341  | 17.152 | 25.878  | 29.458  | 27.796  | 20.206  | 256.348 | 33.029  |
| 29.44   | 17.916  | 42.488  | 36.165  | 25.878  | 46.392 | 25.267  | 22.482  | 40.017  | 20.841 | 36.105  | 19.169  | 29.44   | 18.536  | 34.878  | 28.525  |
| 44.592  | 37.02   | 18.027  | 21.977  | 40.017  | 31.49  | 32.984  | 33.029  | 16.8    | 44.033 | 17.023  | 33.029  | 19.686  | 44.033  | 25.878  | 18.904  |
| 33.37   | 44.465  | 21.563  | 18.152  | 29.066  | 42.141 | 44.592  | 45.892  | 35.153  | 25.521 | 41.694  | 26.672  | 20.341  | 17.26   | 29.44   | 18.973  |
| 44.592  | 46.074  | 20.341  | 29.779  | 27.119  | 43.102 | 34.878  | 39.831  | 16.28   | 38.102 | 31.125  | 23.798  | 34.878  | 23.916  | 42.736  | 36.189  |
| 34.878  | 17.56   | 34.878  | 22.323  | 20.341  | 17.202 | 20.341  | 19.173  | 29.44   | 48.001 | 25.878  | 34.326  | 20.341  | 26.999  | 18.454  | 18.152  |
| 42.488  | 47.632  | 28.312  | 38.102  | 34.878  | 36.084 | 42.413  | 23.44   | 40.017  | 21.758 | 20.341  | 17.31   | 25.267  | 277.925 |         |         |
| 41.694  | 26.368  | 44.592  | 33.166  | 45.497  | 33.029 | 40.579  | 25.189  | 18.747  | 19.042 | 42.488  | 33      | 31.125  | 18.5    |         |         |
| 44.729  | 43.996  | 18.924  | 27.258  | 42.271  | 36.981 | 29.44   | 36.293  | 42.488  | 23.749 | 42.488  | 39.502  | 27.751  | 19.346  |         |         |
| 18.956  | 16.725  | 25.878  | 34.195  | 16.053  | 19.42  | 16.796  | 20.206  | 22.423  | 38.178 | 40.017  | 20.105  | 16.524  | 19.346  |         |         |
